# Supplementary material for: Rhenium(i) complexes with phenanthrolines bearing electron-withdrawing Cl and electron-donating CH3substituents – synthesis, photophysical, thermal, and electrochemical properties with electroluminescence ability
Source: Royal Society of Chemistry journal article supplement (doi:10.1039/c6ra23935h), 2016-01-01
Supplement: c6ra23935h1.pdf [file c6ra23935h1.pdf]

## SUPPLEMENTARY MATERIALS

### **Rhenium(I) complexes with phenanthrolines bearing electron withdrawing Cl and electron donating CH<sub>3</sub> substituents - synthesis, photophysical, thermal and electrochemical properties with electroluminescence ability**

**Anna Świtlicka<sup>a</sup>, Tomasz Klemens<sup>a</sup>, Barbara Machura<sup>a</sup>, Ewa Schab-Balcerzak<sup>a,b</sup>, Katarzyna Laba<sup>b,c</sup>, Mieczysław Lapkowski<sup>b,c</sup>, Marzena Grucela<sup>b</sup>, Jacek Nycz<sup>a</sup>, Marcin Szala<sup>a</sup>, Magdalena Kania<sup>d</sup>**

*<sup>a</sup>Institute of Chemistry, University of Silesia, 9 Szkolna Str., 40-006 Katowice, Poland,*

*<sup>b</sup>Centre of Polymer and Carbon Materials, Polish Academy of Sciences, 34 M. Curie-Skłodowska Str., 41-819 Zabrze, Poland*

*<sup>c</sup>Silesian University of Technology, Faculty of Chemistry, 9 Strzody Str., 44-100 Gliwice, Poland*

*<sup>d</sup>Mass Spectrometry Group, Institute of Organic Chemistry, Polish Academy of Sciences, Kasprzaka 44/52, PO Box 58, 01-224 Warszawa 42, Poland*

**Physical measurements:** The IR spectra were recorded on a Nicolet iS5 FTIR spectrophotometer in the spectral range 4000–400 cm<sup>-1</sup> with the samples in the form of KBr pellets. The electronic spectra were measured on a Perkin Elmer Lambda 40 UV/Vis Spectrometer (in CH<sub>3</sub>CN and CHCl<sub>3</sub> solution) and Jasco V570 UV-V-NIR Spectrometer (in solid state as film deposited on glass substrate and as blends with PVK and PVK:PBD mixture on glass substrate). The <sup>1</sup>H NMR and <sup>13</sup>C NMR spectra were recorded (295 K) on Bruker Avance 400 NMR spectrometer at a resonance frequency of 400 MHz for <sup>1</sup>H NMR spectra and 100 MHz for <sup>13</sup>C NMR spectra or on Bruker Avance 500 NMR spectrometer at a resonance frequency of 500 MHz for <sup>1</sup>H NMR spectra and 125 MHz for <sup>13</sup>C NMR spectra using DMSO-d<sub>6</sub> or CDCl<sub>3</sub> as solvent and TMS as an internal solvent.

The HR MS measurements were performed using MALDI Synapt G2-S HDMS (*Waters Inc*) mass spectrometer equipped with an electrospray (ESI) ion source and q-TOF type mass analyzer. The instrument was controlled and recorded data were processed using *MassLynx V4.1* software package (*Waters Inc*). The analyzed samples were dissolved in a mixture of MeOH and CH<sub>2</sub>Cl<sub>2</sub> (3/1).

The ESI HR MS spectra were recorded in the positive ion mode, in the *m/z* range 100 – 3000. As a desolvation and a cone gas nitrogen was used. The ion source parameters were optimized for each

analyzed sample to obtain the best intensity of the signals corresponding to the analyzed compound. The source temperature and desolvation temperature was kept at 80 °C and 150 °C, respectively, for all measurements.

Steady-state luminescence spectra of solid state and solution samples were measured on the FLS-980 fluorescence spectrophotometer equipped with a 450 W Xe lamp and high-gain photomultiplier PMT + 500nm (Hamamatsu, R928P) detector. The PL lifetime measurement was performed with a time correlated single photon counting (TCSPC) or multi-channel scaling (MCS) method. Excitation wavelength (375 nm or 470 nm) for TCSPC was obtained using the TCSPC diode with various pulse periods as light source. For MCS excitation wavelength was obtained using 60W microsecond Xe flashlamp. Photoluminescence spectra (PL) in solid state as thin film and as blends with PVK and with PVK:PBD (50:50) mixture deposited on glass substrate were registered using Varian Carry Eclipse Fluorescence Spectrophotometer. Differential Scanning Calorimetry (DSC) was performed with a TA-DSC 2010 apparatus, under nitrogen atmosphere with heating/cooling rate 20 deg/min using sealed aluminum pans. Thermogravimetric analysis (TGA) was done using a Mettler Toledo TGA/DSC STARe system over the temperature range from 25–600°C at a heating rate of 10° C min<sup>-1</sup> under a constant nitrogen flow of 60 mL min<sup>-1</sup>. The obtained TGA data were analyzed using the Mettler-Toledo Star System SW 9.30. Electrochemical measurements were carried out using eDAQ EA161 potentiostat. Cyclic voltammetry experiments were conducted in Ar purged 0.2 M solutions of electrolyte Bu<sub>4</sub>NPF<sub>6</sub> (Aldrich, 99%) in acetonitrile (Aldrich, HPLC grade) at room temperature. The electrochemical cell comprised of a 1 mm diameter platinum disc, a platinum coil and a silver coil electrode as a working electrode, a counter electrode and a quasi-reference electrode, respectively. In each electrochemical experiment the reference electrode potential was monitored using ferrocene (Fc) as the internal standard. All electrochemical measurements were performed in 1.0 mM concentrations of the investigated compounds using a scan rate of 100 mV s<sup>-1</sup>. The approximation of IP-EA energy level values was calculated from the oxidation and reduction potential onsets by assuming the absolute energy level of Fc/Fc<sup>+</sup> as -5.1 eV to vacuum. The electrochemical band gap was taken as the difference between the electron affinity and ionization potential energy levels. Active layers thickness was measured by atomic force microscopy (AFM) Topometrix Explorer TMX 2000. Current – voltage measurements were carried out using a Keithley 2401 source-measure unit.

## Tables:

**Table S1.** Crystal data and structure refinement of **1**, **3** and **5** complexes.

**Table S2.** Comparison of experimental and theoretical bond lengths [ $\text{\AA}$ ] and angles [ $^\circ$ ] for **1**, **3** and **5**.

**Table S3.** Short intra- and intermolecular contacts detected in the structures of the tricarbonyl rhenium(I) complexes.

**Table S4.** The energies and characters of the selected spin-allowed electronic transitions for **1** calculated with the TDDFT/B3LYP method, together with assignment to the experimental absorption bands.

**Table S5.** The energies and characters of the selected spin-allowed electronic transitions for **2** calculated with the TDDFT/B3LYP method, together with assignment to the experimental absorption bands.

**Table S6.** The energies and characters of the selected spin-allowed electronic transitions for **3** calculated with the TDDFT/B3LYP method, together with assignment to the experimental absorption bands.

**Table S7.** The energies and characters of the selected spin-allowed electronic transitions for **4** calculated with the TDDFT/B3LYP method, together with assignment to the experimental absorption bands.

**Table S8.** The energies and characters of the selected spin-allowed electronic transitions for **5** calculated with the TDDFT/B3LYP method, together with assignment to the experimental absorption bands.

**Table S9.** Percentage contributions of Re, CO, phen and Cl units to the selected occupied and unoccupied molecular orbitals of **1** in the ground state, calculated at the DFT/B3LYP/DEF2-TZVPD level.

**Table S10.** Percentage contributions of Re, CO, phen and Cl units to the selected occupied and unoccupied molecular orbitals of **2** in the ground state, calculated at the DFT/B3LYP/DEF2-TZVPD level.

**Table S11.** Percentage contributions of Re, CO, phen and Cl units to the selected occupied and unoccupied molecular orbitals of **3** in the ground state, calculated at the DFT/B3LYP/DEF2-TZVPD level.

**Table S12.** Percentage contributions of Re, CO, phen and Cl units to the selected occupied and unoccupied molecular orbitals of **4** in the ground state, calculated at the DFT/B3LYP/DEF2-TZVPD level.

**Table S13.** Percentage contributions of Re, CO, phen and Cl units to the selected occupied and unoccupied molecular orbitals of **5** in the ground state, calculated at the DFT/B3LYP/DEF2-TZVPD level.

**Table S14.** Percentage contributions of Re, CO, phen and Cl units to the the HSOMO and LSOMO involved in TD-DFT triplet excitations

**Figures:**

**Figure S1.** A view of the crystal packing showing intermolecular  $\pi$ - $\pi$  stacking interactions for **1**, **3** and **5**

**Figure S2.** Excitation and emission spectra together with PL lifetime curves for **1-5**.

**Figure S3.** Emission spectra of PVK and PVK:PBD 1:1 films on glass.

**Figure S4.** Frontier molecular orbitals of **1-5** computed at the DFT/B3LYP/DEF2-TZVPD level .

**Figure S5.** Isodensity surface electron spin density for compounds **1-5** at its  $T_1$  state geometry calculated at DFT/UB3LYP/def2-TZVPD level of theory associated with the PCM model in  $CH_3CN$  as a solvent.

**Figure S6.**  $^1H$  NMR spectrum of **1**

**Figure S7.**  $^1H$  NMR spectrum of **2**

**Figure S8.**  $^1H$  NMR spectrum of **3**

**Figure S9.**  $^1H$  NMR spectrum of **4**

**Figure S10.**  $^1H$  NMR spectrum of **5**

**Figure S11.**  $^{13}C$  NMR spectrum of **1**

**Figure S12.**  $^{13}C$  NMR spectrum of **2**

**Figure S13.**  $^{13}C$  NMR spectrum of **3**

**Figure S14.**  $^{13}C$  NMR spectrum of **4**

**Figure S15.**  $^{13}C$  NMR spectrum of **5**

**Figure S16.** DSC thermograms (heating 20 deg/min ) of all investigated complexes: (a) compound **1**, (b) **2**, (c) **3**, (d) **4** and (e) **5**.

**Table S1.** Crystal data and structure refinement of **1**, **3** and **5** complexes.

|                                                 | <b>1</b>                                                                         | <b>3</b>                                                                        | <b>5</b>                                                                                            |
|-------------------------------------------------|----------------------------------------------------------------------------------|---------------------------------------------------------------------------------|-----------------------------------------------------------------------------------------------------|
| Empirical formula                               | C <sub>18</sub> H <sub>12</sub> Cl <sub>3</sub> N <sub>2</sub> O <sub>3</sub> Re | C <sub>15</sub> H <sub>5</sub> Cl <sub>4</sub> N <sub>2</sub> O <sub>3</sub> Re | C <sub>17</sub> H <sub>10</sub> Cl <sub>2</sub> N <sub>3</sub> O <sub>3</sub> Re                    |
| Formula weight                                  | 596.86                                                                           | 589.22                                                                          | 561.39                                                                                              |
| Temperature [K]                                 | 298.0(2)                                                                         | 298.0(2)                                                                        | 298.0(2)                                                                                            |
| Wavelength [Å]                                  | 0.71073                                                                          | 0.71073                                                                         | 0.71073                                                                                             |
| Crystal system                                  | monoclinic                                                                       | monoclinic                                                                      | triclinic                                                                                           |
| Space group                                     | P2 <sub>1</sub> /n                                                               | P2 <sub>1</sub> /c                                                              | P-1                                                                                                 |
| Unit cell dimensions [Å, °]                     | 10.8752(5)<br>32.4799(13)<br>10.9891(4)<br><br>98.199(3)                         | a = 6.6848(5)<br>b = 20.9252(16)<br>c = 12.6551(7)<br><br>β = 100.710(7)        | a = 8.3105(3)<br>b = 9.7851(4)<br>c = 12.3202(5)<br>α = 84.319(3)<br>β = 85.261(3)<br>γ = 67.529(4) |
| Volume [Å <sup>3</sup> ]                        | 3842.0(3)                                                                        | 1739.4(2)                                                                       | 920.16(7)                                                                                           |
| Z                                               | 8                                                                                | 4                                                                               | 2                                                                                                   |
| Density (calculated) [Mg/m <sup>3</sup> ]       | 2.064                                                                            | 2.250                                                                           | 2.026                                                                                               |
| Absorption coefficient [mm <sup>-1</sup> ]      | 6.764                                                                            | 7.618                                                                           | 6.915                                                                                               |
| F(000)                                          | 2272                                                                             | 1104                                                                            | 532                                                                                                 |
| Crystal size [mm]                               | 0.24 x 0.11 x 0.04                                                               | 0.19 x 0.09 x 0.03                                                              | 0.09 x 0.09 x 0.04                                                                                  |
| θ range for data collection [°]                 | 3.41 to 25.05                                                                    | 3.35 to 25.05                                                                   | 3.88 to 25.05                                                                                       |
| Index ranges                                    | -11 ≤ h ≤ 12<br>-38 ≤ k ≤ 33<br>-13 ≤ l ≤ 12                                     | -7 ≤ h ≤ 7<br>-24 ≤ k ≤ 24<br>-15 ≤ l ≤ 15                                      | -9 ≤ h ≤ 9<br>-11 ≤ k ≤ 11<br>-13 ≤ l ≤ 14                                                          |
| Reflections collected                           | 28790                                                                            | 8748                                                                            | 7649                                                                                                |
| Independent reflections                         | 6774 (R <sub>int</sub> = 0.063)                                                  | 3069 (R <sub>int</sub> = 0.045)                                                 | 3248 (R <sub>int</sub> = 0.048)                                                                     |
| Completeness to 2θ=50° [%]                      | 99.7                                                                             | 99.8                                                                            | 99.8                                                                                                |
| Max. and min. transmission                      | 1.000 and 0.483                                                                  |                                                                                 | 1.000 and 0.362                                                                                     |
| Data / restraints / parameters                  | 6774 / 0 / 493                                                                   | 3069 / 0 / 236                                                                  | 3248 / 0 / 236                                                                                      |
| Goodness-of-fit on F <sup>2</sup>               | 0.969                                                                            | 1.233                                                                           | 0.971                                                                                               |
| Final R indices [I > 2σ(I)]                     | R <sub>1</sub> = 0.0494<br>wR <sub>2</sub> = 0.0965                              | R <sub>1</sub> = 0.0566<br>wR <sub>2</sub> = 0.1067                             | R <sub>1</sub> = 0.0298<br>wR <sub>2</sub> = 0.0484                                                 |
| R indices (all data)                            | R <sub>1</sub> = 0.0631<br>wR <sub>2</sub> = 0.1008                              | R <sub>1</sub> = 0.0801<br>wR <sub>2</sub> = 0.1122                             | R <sub>1</sub> = 0.0404<br>wR <sub>2</sub> = 0.0512                                                 |
| Largest diff. peak and hole [eÅ <sup>-3</sup> ] | 3.08 and -2.55                                                                   | 1.41 and -2.75                                                                  | 0.76 and -1.00                                                                                      |
| CCDC number                                     | 1501825                                                                          | 1501826                                                                         | 1501827                                                                                             |

**Table S2.** Experimental and theoretical bond lengths [ $\text{\AA}$ ] and angles [ $^\circ$ ] for **1**, **3** and **5**.

| Bond lengths | Exp.       | Opt.           | Bond angles       | Exp.       | Opt.           |
|--------------|------------|----------------|-------------------|------------|----------------|
|              |            | S <sub>0</sub> |                   |            | S <sub>0</sub> |
| <b>1</b>     |            |                |                   |            |                |
| Re(1)–C(1)   | 1.909(11)  | 1.92942        | C(2)–Re(1)–C(1)   | 83.8(5)    | 83.798         |
| Re(1)–C(2)   | 1.881(11)  | 1.92776        | C(3)–Re(1)–C(1)   | 90.2(5)    | 90.955         |
| Re(1)–C(3)   | 1.903(11)  | 1.91518        | C(3)–Re(1)–C(2)   | 91.2(4)    | 90.903         |
| Re(1)–N(1)   | 2.184(7)   | 2.23886        | C(1)–Re(1)–N(1)   | 171.0(4)   | 172.511        |
| Re(1)–N(2)   | 2.211(7)   | 2.25072        | C(2)–Re(1)–N(1)   | 100.1(4)   | 100.873        |
| Re(1)–Cl(1)  | 2.484(2)   | 2.54663        | C(3)–Re(1)–N(1)   | 97.8(4)    | 94.795         |
| C(1)–O(1)    | 1.141(13)  | 1.16517        | C(1)–Re(1)–N(2)   | 100.6(4)   | 100.954        |
| C(2)–O(2)    | 1.179(12)  | 1.16523        | C(2)–Re(1)–N(2)   | 172.1(4)   | 172.362        |
| C(3)–O(3)    | 1.139(12)  | 1.91518        | C(3)–Re(1)–N(2)   | 95.3(3)    | 94.965         |
|              |            |                | N(1)–Re(1)–N(2)   | 74.7(3)    | 73.802         |
|              |            |                | C(1)–Re(1)–Cl(1)  | 90.3(4)    | 90.499         |
|              |            |                | C(2)–Re(1)–Cl(1)  | 88.8(3)    | 90.606         |
|              |            |                | C(3)–Re(1)–Cl(1)  | 179.6(3)   | 178.010        |
|              |            |                | N(1)–Re(1)–Cl(1)  | 81.73(19)  | 83.644         |
|              |            |                | N(2)–Re(1)–Cl(1)  | 84.73(19)  | 83.422         |
| Re(2)–C(19)  | 1.917(12)  |                | C(19)–Re(2)–C(20) | 82.4(5)    |                |
| Re(2)–C(20)  | 1.921(11)  |                | C(19)–Re(2)–C(21) | 89.3(5)    |                |
| Re(2)–C(21)  | 1.938(12)  |                | C(20)–Re(2)–C(21) | 90.4(5)    |                |
| Re(2)–N(3)   | 2.213(7)   |                | C(19)–Re(2)–N(3)  | 172.8(4)   |                |
| Re(2)–N(4)   | 2.192(8)   |                | C(20)–Re(2)–N(3)  | 100.3(4)   |                |
| Re(2)–Cl(2)  | 2.485(2)   |                | C(21)–Re(2)–N(3)  | 97.3(4)    |                |
| C(19)–O(4)   | 1.136(13)  |                | C(19)–Re(2)–N(4)  | 102.4(4)   |                |
| C(20)–O(5)   | 1.126(12)  |                | C(20)–Re(2)–N(4)  | 174.2(4)   |                |
| C(21)–O(6)   | 1.085(12)  |                | C(21)–Re(2)–N(4)  | 93.0(4)    |                |
|              |            |                | N(3)–Re(2)–N(4)   | 74.6(3)    |                |
|              |            |                | C(19)–Re(2)–Cl(4) | 91.1(3)    |                |
|              |            |                | C(20)–Re(2)–Cl(4) | 93.4(3)    |                |
|              |            |                | C(21)–Re(2)–Cl(4) | 176.2(3)   |                |
|              |            |                | N(3)–Re(2)–Cl(4)  | 82.09(19)  |                |
|              |            |                | N(4)–Re(2)–Cl(4)  | 83.2(2)    |                |
| <b>3</b>     |            |                |                   |            |                |
| Re(1)–C(1)   | 1.914(15)  | 1.93260        | C(2)–Re(1)–C(1)   | 88.5(6)    | 88.627         |
| Re(1)–C(2)   | 1.895(16)  | 1.93445        | C(3)–Re(1)–C(1)   | 90.5(6)    | 90.187         |
| Re(1)–C(3)   | 1.919(17)  | 1.91850        | C(3)–Re(1)–C(2)   | 90.9(7)    | 90.208         |
| Re(1)–N(1)   | 2.155(9)   | 2.21727        | C(1)–Re(1)–N(1)   | 173.4(5)   | 171.907        |
| Re(1)–N(2)   | 2.173(10)  | 2.20584        | C(2)–Re(1)–N(1)   | 97.7(5)    | 98.658         |
| Re(1)–Cl(1)  | 2.462(4)   | 2.53286        | C(3)–Re(1)–N(1)   | 91.4(5)    | 93.289         |
| C(1)–O(1)    | 1.145(15)  | 1.16438        | C(1)–Re(1)–N(2)   | 99.2(5)    | 98.734         |
| C(2)–O(2)    | 1.147(17)  | 1.16428        | C(2)–Re(1)–N(2)   | 171.4(6)   | 171.791        |
| C(3)–O(3)    | 1.091(17)  | 1.16846        | C(3)–Re(1)–N(2)   | 92.7(5)    | 93.378         |
|              |            |                | N(1)–Re(1)–N(2)   | 74.4(4)    | 73.782         |
|              |            |                | C(1)–Re(1)–Cl(1)  | 94.3(4)    | 92.339         |
|              |            |                | C(2)–Re(1)–Cl(1)  | 93.3(5)    | 92.182         |
|              |            |                | C(3)–Re(1)–Cl(1)  | 173.6(5)   | 176.563        |
|              |            |                | N(1)–Re(1)–Cl(1)  | 83.3(3)    | 83.911         |
|              |            |                | N(2)–Re(1)–Cl(1)  | 82.5(3)    | 83.936         |
| <b>5</b>     |            |                |                   |            |                |
| Re(1)–C(1)   | 1.884(7)   | 1.93143        | C(2)–Re(1)–C(1)   | 87.1(2)    | 88.875         |
| Re(1)–C(2)   | 1.919(5)   | 1.93227        | C(3)–Re(1)–C(1)   | 89.2(3)    | 90.155         |
| Re(1)–C(3)   | 1.895(6)   | 1.91613        | C(3)–Re(1)–C(2)   | 89.7(2)    | 90.133         |
| Re(1)–N(1)   | 2.158(4)   | 2.22112        | C(1)–Re(1)–N(1)   | 173.1(2)   | 172.265        |
| Re(1)–N(2)   | 2.191(4)   | 2.21680        | C(2)–Re(1)–N(1)   | 97.22(19)  | 98.041         |
| Re(1)–Cl(1)  | 2.4848(13) | 2.54290        | C(3)–Re(1)–N(1)   | 96.2(2)    | 93.274         |
| C(1)–O(1)    | 1.165(7)   | 1.16537        | C(1)–Re(1)–N(2)   | 100.2(2)   | 98.074         |
| C(2)–O(2)    | 1.144(6)   | 1.16535        | C(2)–Re(1)–N(2)   | 172.3(2)   | 172.254        |
| C(3)–O(3)    | 1.160(6)   | 1.16889        | C(3)–Re(1)–N(2)   | 92.79(18)  | 93.251         |
|              |            |                | N(1)–Re(1)–N(2)   | 75.28(14)  | 74.824         |
|              |            |                | C(1)–Re(1)–Cl(1)  | 92.07(19)  | 92.197         |
|              |            |                | C(2)–Re(1)–Cl(1)  | 92.83(16)  | 92.195         |
|              |            |                | C(3)–Re(1)–Cl(1)  | 177.26(16) | 176.722        |
|              |            |                | N(1)–Re(1)–Cl(1)  | 82.37(10)  | 84.117         |
|              |            |                | N(2)–Re(1)–Cl(1)  | 84.58(10)  | 84.160         |

**Table S3.** Short intra- and intermolecular contacts detected in the structures of the rhenium(I) complexes.

| D—H...A               | D—H  | H...A | D...A<br>[Å] | D—H...A<br>[°] |
|-----------------------|------|-------|--------------|----------------|
| <b>1</b>              |      |       |              |                |
| C(8)–H(8)•••Cl(2)     | 0.93 | 2.72  | 3.108(10)    | 106.00         |
| C(16)–H(16B)•••Cl(3)  | 0.96 | 2.58  | 2.944(17)    | 103.00         |
| C(23)–H(23)•••Cl(1)#1 | 0.93 | 2.74  | 3.643(10)    | 163.00         |
| C(27)–H(27)•••Cl(5)   | 0.96 | 2.69  | 3.078(11)    | 106.00         |
| <b>3</b>              |      |       |              |                |
| C(8)–H(8)•••Cl(2)     | 0.93 | 2.74  | 3.095(14)    | 104.00         |
| <b>5</b>              |      |       |              |                |
| C(4)–H(4)•••N(3)#2    | 0.93 | 2.59  | 3.425(8)     | 149.00         |
| C(6)–H(6)•••Cl(2)     | 0.93 | 2.71  | 3.073(6)     | 104.00         |
| C(12)–H(12)•••Cl(1)#3 | 0.93 | 2.81  | 3.664(5)     | 154.00         |
| C(16)–H(16C)•••O(2)#4 | 0.96 | 2.46  | 3.269(10)    | 141.00         |

Symmetry codes: #1: 1/2-x, -1/2+y, 1/2-z; #2: -1+x, y, z; #3: 1+x, y, z; #4: 1-x, 2-y, 1-z;

**Table S4.** The energies and characters of the selected spin-allowed electronic transitions for **1** calculated with the TDDFT/B3LYP method, together with assignment to the experimental absorption bands.

| Experimental absorption<br>$\lambda$ ; nm<br>( $10^{-3} \epsilon$ ; $M^{-1}cm^{-1}$ ) | Calculated transitions      |             |        |                |                     |
|---------------------------------------------------------------------------------------|-----------------------------|-------------|--------|----------------|---------------------|
|                                                                                       | Major contribution (%)      | Character   | E [eV] | $\lambda$ [nm] | Oscillator strength |
| 386.10 (6.08)                                                                         | H-1 $\rightarrow$ L (95%)   | MLLCT       | 3.02   | 409.33         | 0.0959              |
|                                                                                       | H $\rightarrow$ L+1 (81%)   | MLLCT       | 3.37   | 366.92         | 0.0433              |
|                                                                                       | H-1 $\rightarrow$ L+1 (94%) | MLLCT       | 3.44   | 359.75         | 0.0624              |
| 333.09 (9.12)                                                                         | H-2 $\rightarrow$ L+1 (97%) | MLLCT       | 3.79   | 326.93         | 0.0159              |
| 284.99 (28.58)                                                                        | H-4 $\rightarrow$ L (47%)   | IL/LLCT     | 4.26   | 290.93         | 0.1907              |
|                                                                                       | H-4 $\rightarrow$ L+1 (38%) | IL/LLCT     | 4.51   | 274.62         | 0.1161              |
|                                                                                       | H-6 $\rightarrow$ L (33%)   | LLCT/LMCT   | 4.55   | 272.05         | 0.2572              |
|                                                                                       | H $\rightarrow$ L+4 (26%)   | MLLCT/d-d   |        |                |                     |
| 215.91 (55.60)                                                                        | H-5 $\rightarrow$ L+1 (73%) | LLCT/IL     | 4.80   | 258.17         | 0.1047              |
|                                                                                       | H-4 $\rightarrow$ L+2 (61%) | IL/LLCT     | 5.61   | 220.99         | 0.2970              |
|                                                                                       | H-3 $\rightarrow$ L+4 (5%)  | IL/LLCT/d-d | 5.68   | 218.05         | 0.1503              |

**Table S5.** The energies and characters of the selected spin-allowed electronic transitions for **2** calculated with the TDDFT/B3LYP method, together with assignment to the experimental absorption bands.

| Experimental absorption<br>$\lambda$ ; nm<br>( $10^{-3} \epsilon$ ; $M^{-1}cm^{-1}$ ) | Calculated transitions                                   |                    |        |                |                     |
|---------------------------------------------------------------------------------------|----------------------------------------------------------|--------------------|--------|----------------|---------------------|
|                                                                                       | Major contribution (%)                                   | Character          | E [eV] | $\lambda$ [nm] | Oscillator strength |
| 380.57 (5.61)                                                                         | H-1 $\rightarrow$ L (94%)                                | MLLCT              | 3.04   | 406.84         | 0.0804              |
|                                                                                       | H $\rightarrow$ L+1 (82%)                                | MLLCT              | 3.29   | 376.58         | 0.0270              |
|                                                                                       | H-1 $\rightarrow$ L+1 (96%)                              | MLLCT              | 3.39   | 364.76         | 0.0494              |
| 327.46 (7.19)                                                                         | H-2 $\rightarrow$ L+1 (98%)                              | MLLCT              | 3.75   | 330.79         | 0.0094              |
| 270.70 (38.85)                                                                        | H-4 $\rightarrow$ L (38%)                                | IL/LLCT            | 4.30   | 288.11         | 0.1695              |
|                                                                                       | H-4 $\rightarrow$ L+1 (57%)                              | IL/LLCT            | 4.52   | 274.01         | 0.1634              |
|                                                                                       | H $\rightarrow$ L+4 (32%)                                | MLLCT/d-d          | 4.58   | 270.45         | 0.3279              |
|                                                                                       | H-2 $\rightarrow$ L+3 (45%)                              | MLLCT/d-d          | 4.78   | 259.30         | 0.1465              |
| 231.38 (42.38)                                                                        | H-8 $\rightarrow$ L+1 (36%)                              | IL                 | 5.34   | 232.04         | 0.1470              |
|                                                                                       | H $\rightarrow$ L+6 (23%)<br>H-1 $\rightarrow$ L+9 (21%) | MLLCT<br>MLLCT/d-d | 5.41   | 229.11         | 0.0622              |
| 215.64 (66.61)                                                                        | H-4 $\rightarrow$ L+2 (52%)                              | IL/LLCT            | 5.64   | 219.60         | 0.2882              |
|                                                                                       | H-2 $\rightarrow$ L+6 (35%)                              | MLLCT              | 5.77   | 214.59         | 0.0610              |
|                                                                                       | H-3 $\rightarrow$ L+4 (33%)                              | LLCT/IL/MLCT       | 5.81   | 213.32         | 0.2725              |
|                                                                                       | H-6 $\rightarrow$ L+2 (25%)                              | IL/LLCT            | 5.86   | 211.30         | 0.1422              |
| 196.12 (53.78)                                                                        | H-4 $\rightarrow$ L+4 (66%)                              | IL/LLCT/LMCT       | 5.93   | 208.77         | 0.0800              |
|                                                                                       | H-5 $\rightarrow$ L+4 (60%)                              | LLCT/IL/MLCT       | 6.1418 | 201.87         | 0.0706              |
|                                                                                       | H-6 $\rightarrow$ L+5 (88%)                              | LLCT/IL            | 6.5071 | 190.54         | 0.1067              |

**Table S6.** The energies and characters of the selected spin-allowed electronic transitions for **3** calculated with the TDDFT/B3LYP method, together with assignment to the experimental absorption bands

| Experimental absorption<br>$\lambda$ ; nm<br>( $10^{-3} \epsilon$ ; $M^{-1}cm^{-1}$ ) | Calculated transitions      |              |        |                |                     |
|---------------------------------------------------------------------------------------|-----------------------------|--------------|--------|----------------|---------------------|
|                                                                                       | Major contribution (%)      | Character    | E [eV] | $\lambda$ [nm] | Oscillator strength |
| 393.12 (8.85)                                                                         | H-1 $\rightarrow$ L (82%)   | MLLCT        | 2.86   | 432.95         | 0.0672              |
|                                                                                       | H $\rightarrow$ L+1 (83%)   | MLLCT        | 2.97   | 417.29         | 0.0566              |
|                                                                                       | H-1 $\rightarrow$ L+1 (97%) | MLLCT        | 3.04   | 406.60         | 0.0311              |
| 313.69 (12.50)                                                                        | H-2 $\rightarrow$ L (92%)   | MLLCT        | 3.60   | 343.58         | 0.0304              |
|                                                                                       | H-2 $\rightarrow$ L+1 (88%) | MLLCT        | 3.84   | 322.78         | 0.1619              |
| 274.97 (43.77)                                                                        | H-4 $\rightarrow$ L+1 (93%) | IL/LLCT      | 4.36   | 284.16         | 0.0916              |
|                                                                                       | H-6 $\rightarrow$ L (57%)   | IL/LLCT      | 4.62   | 268.36         | 0.3063              |
|                                                                                       | H-1 $\rightarrow$ L+3 (44%) | MLLCT/d-d    | 4.74   | 261.39         | 0.1484              |
|                                                                                       | H-2 $\rightarrow$ L+2 (43%) | MLCT/LLCT    | 5.08   | 243.64         | 0.1499              |
| 229.13 (46.99)                                                                        | H-2 $\rightarrow$ L+4 (29%) | MLLCT/d-d    | 5.51   | 224.72         | 0.0666              |
|                                                                                       | H-4 $\rightarrow$ L+2 (50%) | IL/LLCT      | 5.59   | 221.65         | 0.0995              |
|                                                                                       | H-2 $\rightarrow$ L+4 (70%) | MLLCT/d-d    | 5.62   | 220.54         | 0.1187              |
| 214.86 (64.10)                                                                        | H-4 $\rightarrow$ L+2 (20%) | IL/LLCT      | 5.66   | 218.83         | 0.1252              |
|                                                                                       | H-5 $\rightarrow$ L+2 (77%) | LLCT/IL/MLCT | 5.69   | 217.72         | 0.1230              |
|                                                                                       | H-2 $\rightarrow$ L+5 (38%) | MLLCT        | 5.85   | 211.81         | 0.1085              |
| 197.45 (55.47)                                                                        | H-6 $\rightarrow$ L+2 (49%) | IL/LLCT      | 5.99   | 206.96         | 0.2085              |
|                                                                                       | H-4 $\rightarrow$ L+5 (43%) | IL/LLCT      | 6.36   | 194.75         | 0.0774              |



**Table S7.** The energies and characters of the selected spin-allowed electronic transitions for **4** calculated with the TDDFT/B3LYP method, together with assignment to the experimental absorption bands

| Experimental absorption<br>$\lambda$ ; nm<br>( $10^{-3} \epsilon$ ; $M^{-1}cm^{-1}$ ) | Calculated transitions       |           |        |                |                     |
|---------------------------------------------------------------------------------------|------------------------------|-----------|--------|----------------|---------------------|
|                                                                                       | Major contribution (%)       | Character | E [eV] | $\lambda$ [nm] | Oscillator strength |
| 384.37 (6.03)                                                                         | H-1 $\rightarrow$ L (92%)    | MLLCT     | 2.95   | 419.32         | 0.0787              |
|                                                                                       | H $\rightarrow$ L+1 (92%)    | MLLCT     | 3.11   | 397.61         | 0.0420              |
|                                                                                       | H-1 $\rightarrow$ L+1 (98%)  | MLLCT     | 3.19   | 387.86         | 0.0299              |
| 268.33 (47.29)                                                                        | H-3 $\rightarrow$ L+1 (79%)  | IL/LLCT   | 4.04   | 306.49         | 0.0842              |
|                                                                                       | H-1 $\rightarrow$ L+2 (78%)  | MLLCT     | 4.34   | 285.59         | 0.0660              |
|                                                                                       | H-4 $\rightarrow$ L+1 (77%)  | IL/LLCT   | 4.50   | 275.48         | 0.0923              |
|                                                                                       | H-6 $\rightarrow$ L (41%)    | LLCT/IL   | 4.65   | 266.53         | 0.3532              |
| 212.80 (63.24)                                                                        | H-2 $\rightarrow$ L+3 (41%)  | MLLCT/d-d | 4.76   | 260.27         | 0.2549              |
|                                                                                       | H-8 $\rightarrow$ L+2 (48%)  | IL        | 5.2545 | 235.96         | 0.0726              |
|                                                                                       | H-4 $\rightarrow$ L+3 (36%)  | IL/LLCT   | 5.7311 | 216.33         | 0.1824              |
|                                                                                       | H-1 $\rightarrow$ L+8 (36%)  | MLLCT     | 5.8706 | 211.20         | 0.0941              |
|                                                                                       | H-2 $\rightarrow$ L+10 (22%) | MLLCT/d-d | 5.9256 | 209.24         | 0.0686              |

**Table S8.** The energies and characters of the selected spin-allowed electronic transitions for **5** calculated with the TDDFT/B3LYP method, together with assignment to the experimental absorption bands

| Experimental absorption<br>$\lambda$ ; nm<br>( $10^{-3} \epsilon$ ; $M^{-1}cm^{-1}$ ) | Calculated transitions       |              |        |                |                     |
|---------------------------------------------------------------------------------------|------------------------------|--------------|--------|----------------|---------------------|
|                                                                                       | Major contribution (%)       | Character    | E [eV] | $\lambda$ [nm] | Oscillator strength |
| 378.85 (6.04)                                                                         | H-1 $\rightarrow$ L (93%)    | MLLCT        | 3.07   | 403.30         | 0.0711              |
|                                                                                       | H $\rightarrow$ L+1 (92%)    | MLLCT        | 3.24   | 382.13         | 0.0309              |
|                                                                                       | H-1 $\rightarrow$ L+1 (97%)  | MLLCT        | 3.33   | 372.37         | 0.0176              |
| 290.45 (19.72)                                                                        | H-3 $\rightarrow$ L+1 (71%)  | IL           | 4.0512 | 306.05         | 0.0432              |
|                                                                                       | H-4 $\rightarrow$ L (42%)    | IL/LLCT      | 4.3860 | 282.68         | 0.0752              |
| 269.40 (40.40)                                                                        | H-4 $\rightarrow$ L+1 (67%)  | IL/LLCT      | 4.5434 | 272.89         | 0.1141              |
|                                                                                       | H-6 $\rightarrow$ L (22%)    | LLCT/IL      | 4.6518 | 266.53         | 0.2277              |
|                                                                                       | H-6 $\rightarrow$ L+1 (30%)  | LLCT/IL      | 4.7992 | 258.34         | 0.2094              |
| 218.00 (60.20)                                                                        | H-3 $\rightarrow$ L+2 (78%)  | IL/LLCT      | 5.3865 | 230.18         | 0.1776              |
|                                                                                       | H-3 $\rightarrow$ L+4 (86%)  | IL/LMCT/LLCT | 5.6021 | 221.32         | 0.0665              |
|                                                                                       | H-8 $\rightarrow$ L (31%)    | IL           | 5.6588 | 219.10         | 0.0791              |
| 200.32 (63.46)                                                                        | H-1 $\rightarrow$ L+11 (21%) | MLLCT        | 5.9825 | 207.24         | 0.1108              |
|                                                                                       | H-8 $\rightarrow$ L+1 (25%)  | IL           | 5.9980 | 206.71         | 0.0817              |
|                                                                                       | H-9 $\rightarrow$ L+1 (22%)  | IL           | 6.0802 | 203.91         | 0.1530              |
|                                                                                       | H-6 $\rightarrow$ L+4 (16%)  | LLCT/LMCT/IL | 6.2380 | 198.76         | 0.0788              |

**Table S9.** Percentage contributions of Re, CO, phen and Cl units to the selected occupied and unoccupied molecular orbitals of **1** in the ground state, calculated at the DFT/B3LYP/DEF2-TZVPD level.

| Orbital | Energy [eV] | Contribution (%) |       |       |       | Character                                                           |
|---------|-------------|------------------|-------|-------|-------|---------------------------------------------------------------------|
|         |             | Re               | 3CO   | Cl    | phen  |                                                                     |
| LUMO+4  | -0.93       | 20.76            | 41.12 | 6.85  | 31.27 | $\pi^*(\text{CO}) + \pi^*(\text{phen}) + d(\text{Re})$              |
| LUMO+3  | -1.07       | 29.09            | 34.94 | 0.99  | 34.98 | $\pi^*(\text{phen}) + \pi^*(\text{CO}) + d(\text{Re})$              |
| LUMO+2  | -1.34       | 9.74             | 14.01 | 5.86  | 70.39 | $\pi^*(\text{phen}) + \pi^*(\text{CO})$                             |
| LUMO+1  | -2.37       | 0.31             | 0.63  | 0.07  | 98.99 | $\pi^*(\text{phen})$                                                |
| LUMO    | -2.72       | 9.11             | 4.16  | 2.68  | 84.05 | $\pi^*(\text{phen})$                                                |
| HOMO    | -6.37       | 43.85            | 26.55 | 23.86 | 5.74  | $d(\text{Re}) + \pi(\text{CO}) + \pi(\text{Cl})$                    |
| HOMO-1  | -6.40       | 34.93            | 18.96 | 17.11 | 29.00 | $d(\text{Re}) + \pi(\text{CO}) + \pi(\text{Cl}) + \pi(\text{phen})$ |
| HOMO-2  | -6.82       | 45.94            | 27.86 | 9.14  | 17.06 | $d(\text{Re}) + \pi(\text{CO}) + \pi(\text{phen})$                  |
| HOMO-3  | -7.07       | 21.07            | 11.59 | 4.22  | 63.12 | $\pi(\text{phen}) + d(\text{Re}) + \pi(\text{CO})$                  |
| HOMO-4  | -7.46       | 0.39             | 0.33  | 13.81 | 85.47 | $\pi(\text{phen}) + \pi(\text{Cl})$                                 |
| HOMO-5  | -7.83       | 9.62             | 5.83  | 64.45 | 20.10 | $\pi(\text{Cl}) + \pi(\text{phen})$                                 |

**Table S10.** Percentage contributions of Re, CO, phen and Cl units to the selected occupied and unoccupied molecular orbitals of **2** in the ground state, calculated at the DFT/B3LYP/DEF2-TZVPD level.

| Orbital | Energy [eV] | Contribution (%) |       |       |       | Character                                                           |
|---------|-------------|------------------|-------|-------|-------|---------------------------------------------------------------------|
|         |             | Re               | 3CO   | Cl    | phen  |                                                                     |
| LUMO+4  | -0.93       | 19.22            | 41.16 | 6.49  | 33.13 | $\pi^*(\text{CO}) + \pi^*(\text{phen}) + d(\text{Re})$              |
| LUMO+3  | -1.08       | 29.54            | 36.21 | 1.04  | 33.21 | $\pi^*(\text{CO}) + \pi^*(\text{phen}) + d(\text{Re})$              |
| LUMO+2  | -1.34       | 9.72             | 15.47 | 6.32  | 68.49 | $\pi^*(\text{phen}) + \pi^*(\text{CO})$                             |
| LUMO+1  | -2.45       | 0.29             | 0.56  | 0.06  | 99.09 | $\pi^*(\text{phen})$                                                |
| LUMO    | -2.74       | 9.05             | 4.03  | 2.69  | 84.23 | $\pi^*(\text{phen})$                                                |
| HOMO    | -6.38       | 43.65            | 26.69 | 24.28 | 5.38  | $d(\text{Re}) + \pi(\text{CO}) + \pi(\text{Cl})$                    |
| HOMO-1  | -6.44       | 38.24            | 20.93 | 19.95 | 20.88 | $d(\text{Re}) + \pi(\text{CO}) + \pi(\text{Cl}) + \pi(\text{phen})$ |
| HOMO-2  | -6.85       | 51.80            | 31.27 | 5.96  | 10.97 | $d(\text{Re}) + \pi(\text{CO})$                                     |
| HOMO-3  | -7.23       | 12.26            | 6.43  | 6.94  | 74.37 | $\pi(\text{phen}) + d(\text{Re})$                                   |
| HOMO-4  | -7.51       | 0.26             | 0.28  | 15.11 | 84.35 | $\pi(\text{phen}) + \pi(\text{Cl})$                                 |
| HOMO-5  | -7.86       | 10.62            | 6.30  | 63.63 | 19.45 | $\pi(\text{Cl}) + \pi(\text{phen}) + d(\text{Re})$                  |

**Table S11.** Percentage contributions of Re, CO, phen and Cl units to the selected occupied and unoccupied molecular orbitals of **3** in the ground state, calculated at the DFT/B3LYP/DEF2-TZVPD level.

| Orbital | Energy [eV] | Contribution (%) |       |       |       | Character                                                           |
|---------|-------------|------------------|-------|-------|-------|---------------------------------------------------------------------|
|         |             | Re               | 3CO   | Cl    | phen  |                                                                     |
| LUMO+4  | -1.00       | 31.98            | 41.98 | 10.56 | 15.48 | $\pi^*(\text{CO}) + d(\text{Re}) + \pi^*(\text{phen})$              |
| LUMO+3  | -1.22       | 24.13            | 43.73 | 1.15  | 30.99 | $\pi^*(\text{CO}) + \pi^*(\text{phen}) + d(\text{Re})$              |
| LUMO+2  | -1.55       | 8.67             | 4.76  | 2.97  | 83.60 | $\pi^*(\text{phen})$                                                |
| LUMO+1  | -2.82       | 0.31             | 0.46  | 0.22  | 99.01 | $\pi^*(\text{phen})$                                                |
| LUMO    | -2.94       | 7.59             | 3.66  | 2.74  | 86.01 | $\pi^*(\text{phen})$                                                |
| HOMO    | -6.41       | 42.33            | 27.47 | 25.47 | 4.73  | $d(\text{Re}) + \pi(\text{CO}) + \pi(\text{Cl})$                    |
| HOMO-1  | -6.47       | 40.63            | 22.67 | 23.11 | 13.59 | $d(\text{Re}) + \pi(\text{CO}) + \pi(\text{Cl}) + \pi(\text{phen})$ |
| HOMO-2  | -6.92       | 59.64            | 34.18 | 0.52  | 5.66  | $d(\text{Re}) + \pi(\text{CO})$                                     |
| HOMO-3  | -7.18       | 3.97             | 1.34  | 9.72  | 84.97 | $\pi(\text{phen})$                                                  |
| HOMO-4  | -7.77       | 2.52             | 1.80  | 39.97 | 55.71 | $\pi(\text{phen}) + \pi(\text{Cl})$                                 |
| HOMO-5  | -7.94       | 10.80            | 5.62  | 64.00 | 19.58 | $\pi(\text{Cl}) + \pi(\text{phen}) + d(\text{Re})$                  |

**Table S12.** Percentage contributions of Re, CO, phen and Cl units to the selected occupied and unoccupied molecular orbitals of **4** in the ground state, calculated at the DFT/B3LYP/DEF2-TZVPD level.

| Orbital | Energy [eV] | Contribution (%) |       |       |       | Character                                                           |
|---------|-------------|------------------|-------|-------|-------|---------------------------------------------------------------------|
|         |             | Re               | 3CO   | Cl    | phen  |                                                                     |
| LUMO+4  | -0.97       | 30.89            | 39.60 | 9.78  | 19.76 | $\pi^*(\text{CO}) + d(\text{Re}) + \pi^*(\text{phen})$              |
| LUMO+3  | -1.20       | 23.87            | 46.77 | 1.15  | 28.21 | $\pi^*(\text{CO}) + \pi^*(\text{phen}) + d(\text{Re})$              |
| LUMO+2  | -1.40       | 8.88             | 7.79  | 3.62  | 79.71 | $\pi^*(\text{phen})$                                                |
| LUMO+1  | -2.65       | 0.30             | 0.56  | 0.24  | 98.90 | $\pi^*(\text{phen})$                                                |
| LUMO    | -2.83       | 7.59             | 3.75  | 2.78  | 85.88 | $\pi^*(\text{phen})$                                                |
| HOMO    | -6.40       | 42.30            | 27.57 | 25.15 | 4.98  | $d(\text{Re}) + \pi(\text{CO}) + \pi(\text{Cl})$                    |
| HOMO-1  | -6.45       | 41.34            | 23.22 | 23.15 | 12.29 | $d(\text{Re}) + \pi(\text{CO}) + \pi(\text{Cl}) + \pi(\text{phen})$ |
| HOMO-2  | -6.90       | 59.74            | 34.23 | 0.52  | 5.51  | $d(\text{Re}) + \pi(\text{CO})$                                     |
| HOMO-3  | -7.27       | 4.28             | 1.40  | 14.34 | 79.98 | $\pi(\text{phen}) + \pi(\text{Cl})$                                 |
| HOMO-4  | -7.70       | 1.64             | 1.28  | 33.13 | 63.95 | $\pi(\text{phen}) + \pi(\text{Cl})$                                 |
| HOMO-5  | -7.94       | 11.82            | 6.42  | 64.39 | 17.37 | $\pi(\text{Cl}) + \pi(\text{phen}) + d(\text{Re})$                  |

**Table S13.** Percentage contributions of Re, CO, phen and Cl units to the selected occupied and unoccupied molecular orbitals of **5** in the ground state, calculated at the DFT/B3LYP/DEF2-TZVPD level.

| Orbital | Energy [eV] | Contribution (%) |       |       |       | Character                                                           |
|---------|-------------|------------------|-------|-------|-------|---------------------------------------------------------------------|
|         |             | Re               | 3CO   | Cl    | phen  |                                                                     |
| LUMO+11 | -0.05       | 11.75            | 29.36 | 2.09  | 56.80 | $\pi^*(\text{phen}) + \pi^*(\text{CO}) + d(\text{Re})$              |
| LUMO+5  | -0.51       | 0.70             | 14.58 | 0.09  | 84.63 | $\pi^*(\text{phen}) + \pi^*(\text{CO})$                             |
| LUMO+4  | -0.93       | 29.49            | 37.14 | 9.24  | 24.13 | $\pi^*(\text{CO}) + d(\text{Re}) + \pi^*(\text{phen})$              |
| LUMO+3  | -1.16       | 25.71            | 45.81 | 1.11  | 27.37 | $\pi^*(\text{CO}) + \pi^*(\text{phen}) + d(\text{Re})$              |
| LUMO+2  | -1.28       | 9.67             | 11.10 | 4.48  | 74.75 | $\pi^*(\text{phen}) + \pi^*(\text{CO})$                             |
| LUMO+1  | -2.49       | 0.47             | 0.64  | 0.32  | 98.57 | $\pi^*(\text{phen})$                                                |
| LUMO    | -2.68       | 8.29             | 4.21  | 3.10  | 84.40 | $\pi^*(\text{phen})$                                                |
| HOMO    | -6.37       | 42.56            | 27.88 | 25.19 | 4.37  | $d(\text{Re}) + \pi(\text{CO}) + \pi(\text{Cl})$                    |
| HOMO-1  | -6.44       | 41.81            | 23.70 | 23.89 | 10.60 | $d(\text{Re}) + \pi(\text{CO}) + \pi(\text{Cl}) + \pi(\text{phen})$ |
| HOMO-2  | -6.87       | 59.67            | 34.42 | 0.58  | 5.33  | $d(\text{Re}) + \pi(\text{CO})$                                     |
| HOMO-3  | -7.13       | 3.51             | 1.25  | 7.27  | 87.97 | $\pi(\text{phen})$                                                  |
| HOMO-4  | -7.60       | 0.50             | 0.40  | 14.78 | 84.32 | $\pi(\text{phen}) + \pi(\text{Cl})$                                 |
| HOMO-5  | -7.88       | 10.13            | 5.66  | 69.37 | 14.84 | $\pi(\text{Cl}) + \pi(\text{phen}) + d(\text{Re})$                  |
| HOMO-6  | -7.91       | 9.92             | 65.10 | 5.97  | 19.01 | $\pi(\text{CO}) + \pi(\text{phen})$                                 |
| HOMO-8  | -9.08       | 1.46             | 1.29  | 1.79  | 95.46 | $\pi(\text{phen})$                                                  |
| HOMO-9  | -9.18       | 2.68             | 1.32  | 4.12  | 91.88 | $\pi(\text{phen})$                                                  |

**Table S14.** Percentage contributions of Re, CO, phen and Cl units to the the HSOMO and LSOMO involved in TD-DFT triplet excitations

| Związek  | Orbital | Re    | CO    | Cl    | phen  |
|----------|---------|-------|-------|-------|-------|
| <b>1</b> | HOMO    | 36.27 | 19.37 | 14.55 | 29.81 |
|          | LUMO    | 6.64  | 4.57  | 1.74  | 87.05 |
| <b>2</b> | HOMO    | 43.51 | 23.41 | 20.16 | 12.92 |
|          | LUMO    | 4.20  | 4.79  | 2.13  | 88.88 |
| <b>3</b> | HOMO    | 40.91 | 22.36 | 20.99 | 15.74 |
|          | LUMO    | 7.58  | 4.81  | 2.23  | 85.38 |
| <b>4</b> | HOMO    | 41.18 | 22.61 | 20.86 | 15.35 |
|          | LUMO    | 8.13  | 5.00  | 2.38  | 84.49 |
| <b>5</b> | HOMO    | 42.16 | 23.45 | 21.05 | 13.34 |
|          | LUMO    | 8.95  | 5.51  | 2.72  | 82.82 |

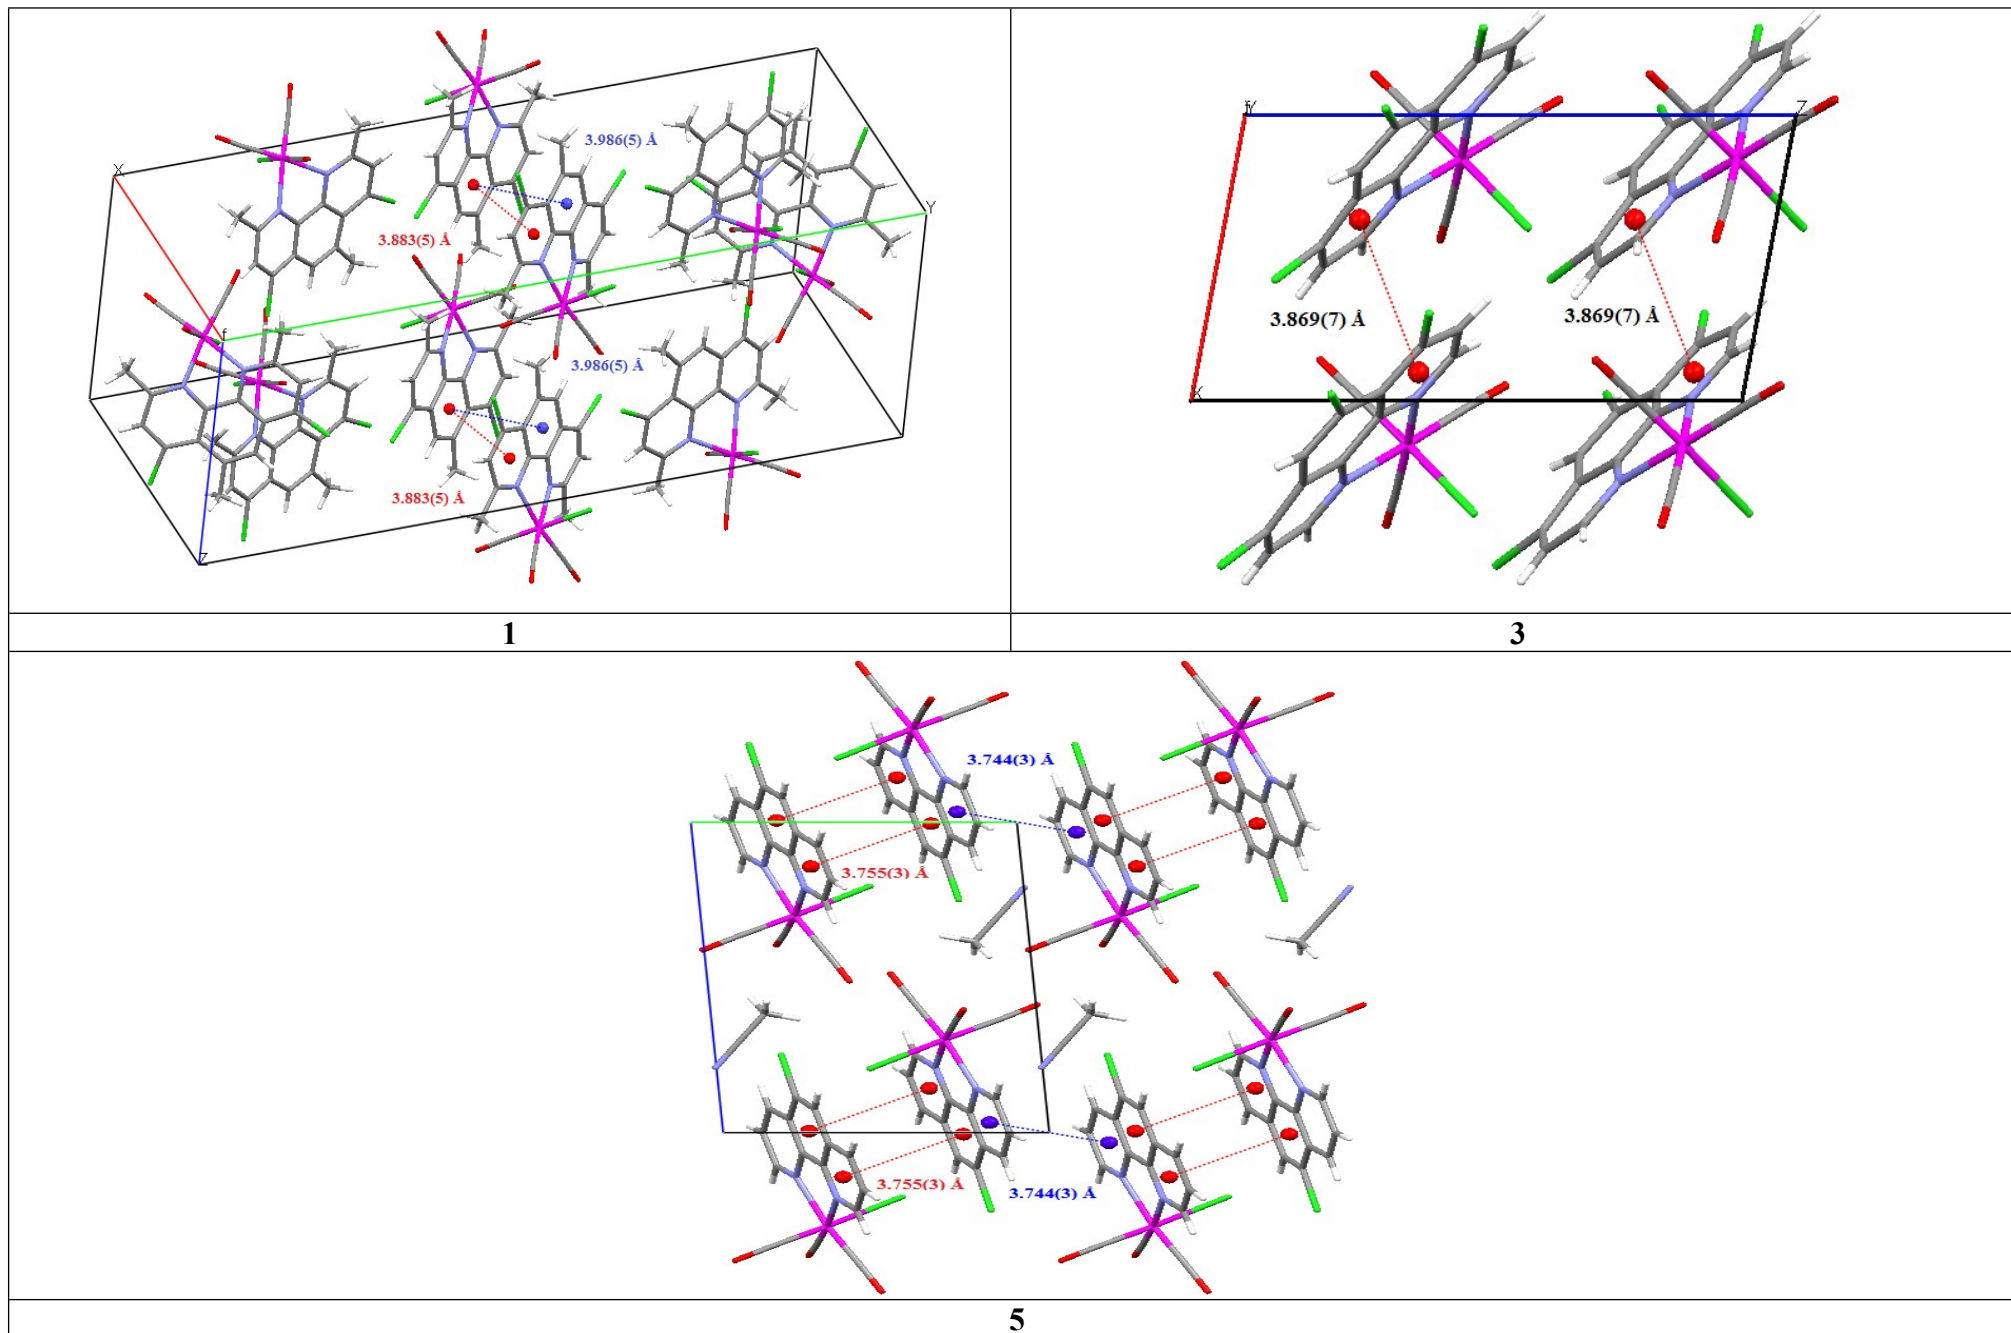

**Figure S1.** A view of the crystal packing showing intermolecular  $\pi\cdots\pi$  stacking interactions for **1**, **3** and **5**.

**Figure S2.** Excitation and emission spectra together with PL lifetime curves for 1-5.

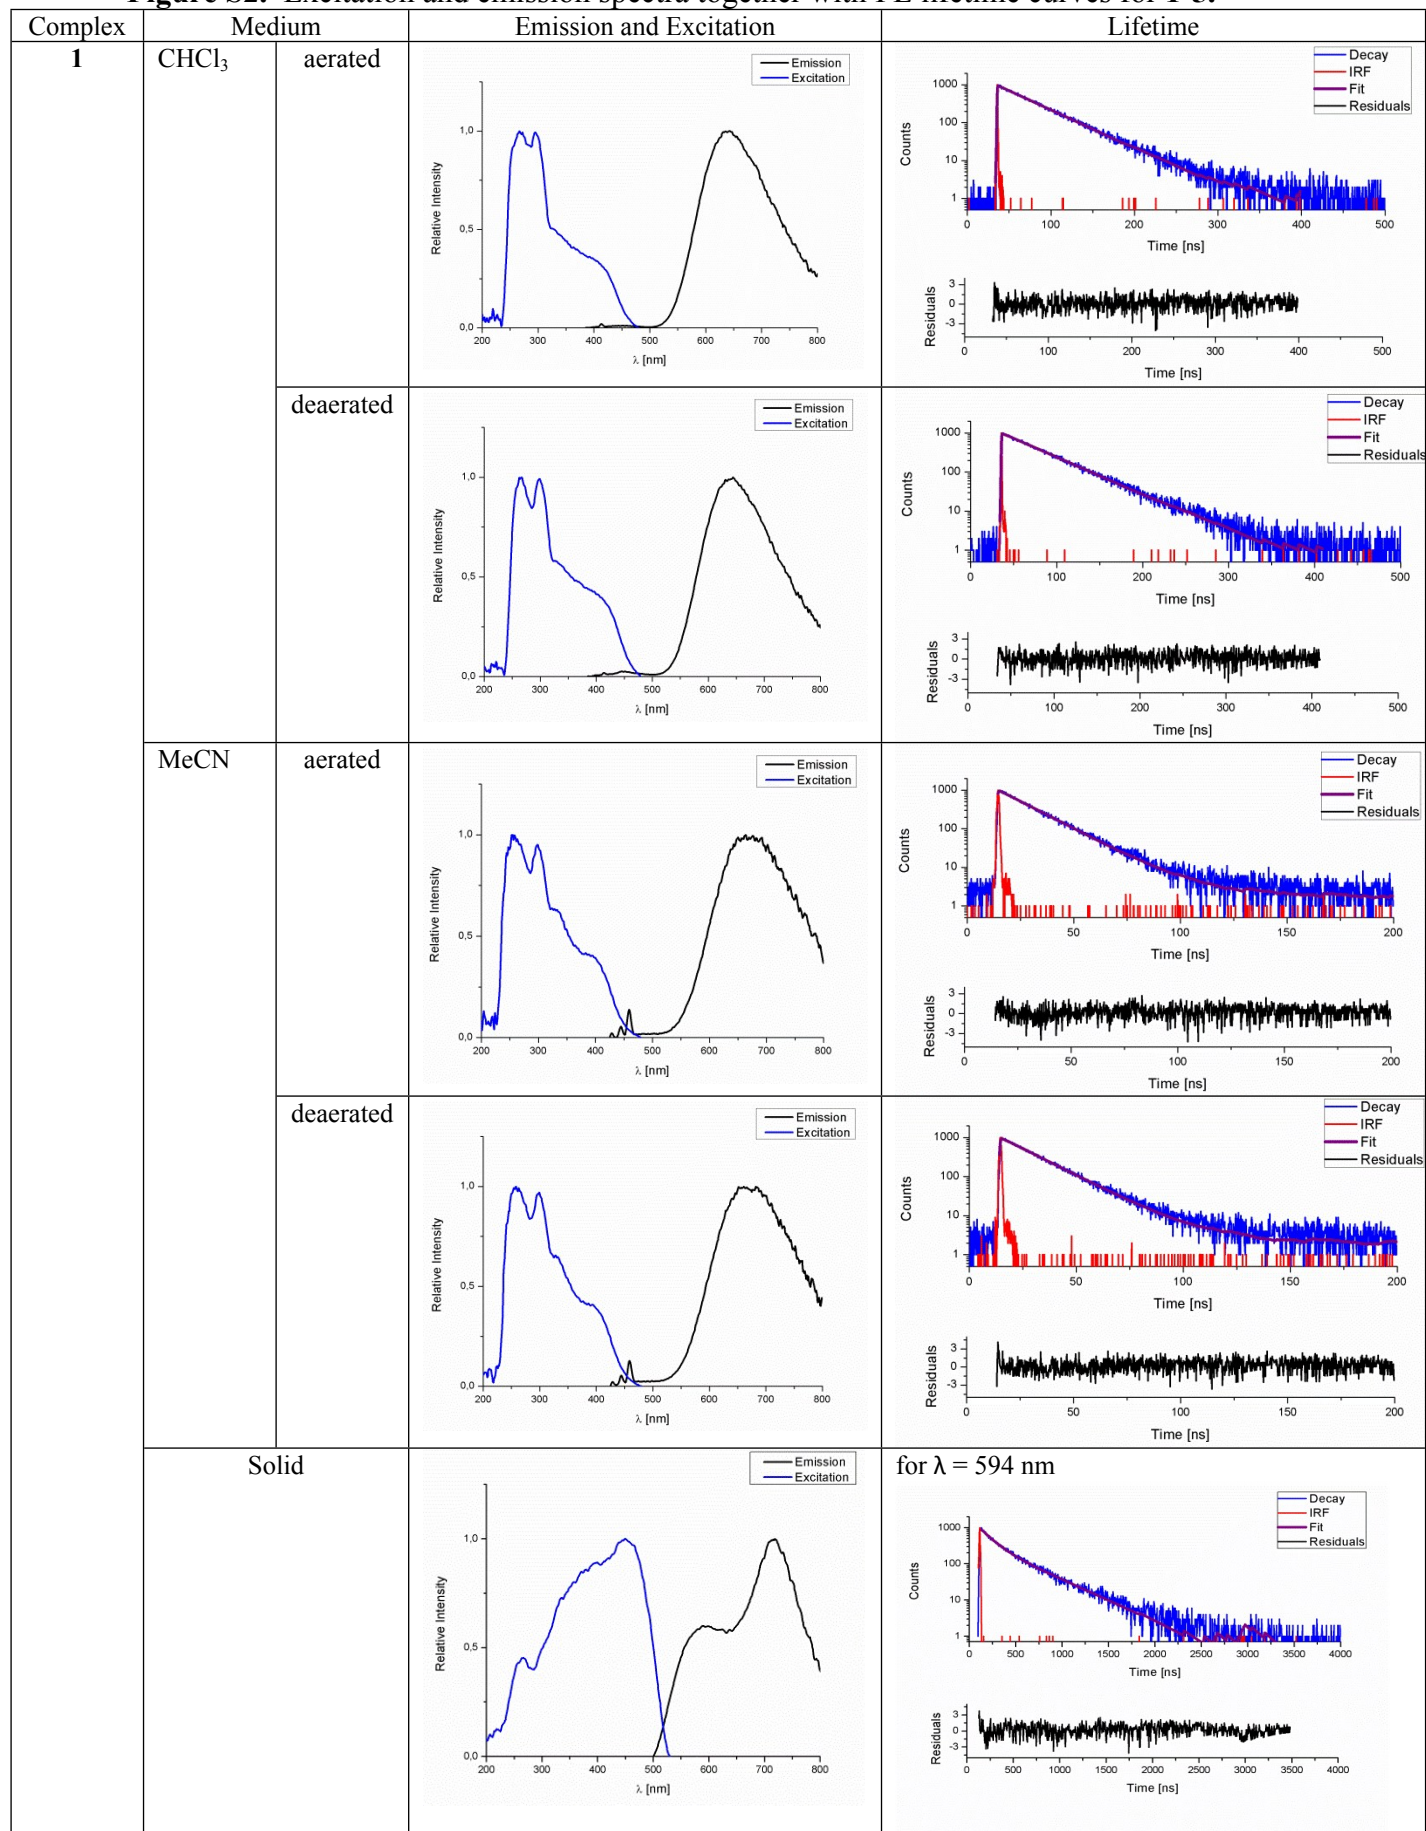



|   |                              |           |                                                                                                                                                                          |
|---|------------------------------|-----------|--------------------------------------------------------------------------------------------------------------------------------------------------------------------------|
|   |                              |           | <p>for <math>\lambda = 716 \text{ nm}</math></p> 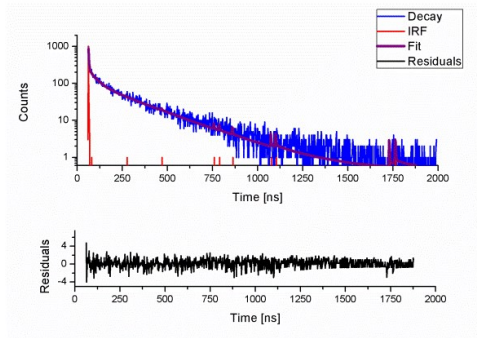                                      |
|   | EtOH-MeOH <sup>a</sup> (77K) |           |       |
| 2 | CHCl <sub>3</sub>            | aerated   |     |
|   |                              | deaerated |                                                                                                                                                                          |
|   | MeCN                         | aerated   |   |
|   |                              | deaerated |                                                                                                                                                                          |
|   | Solid                        |           |   |

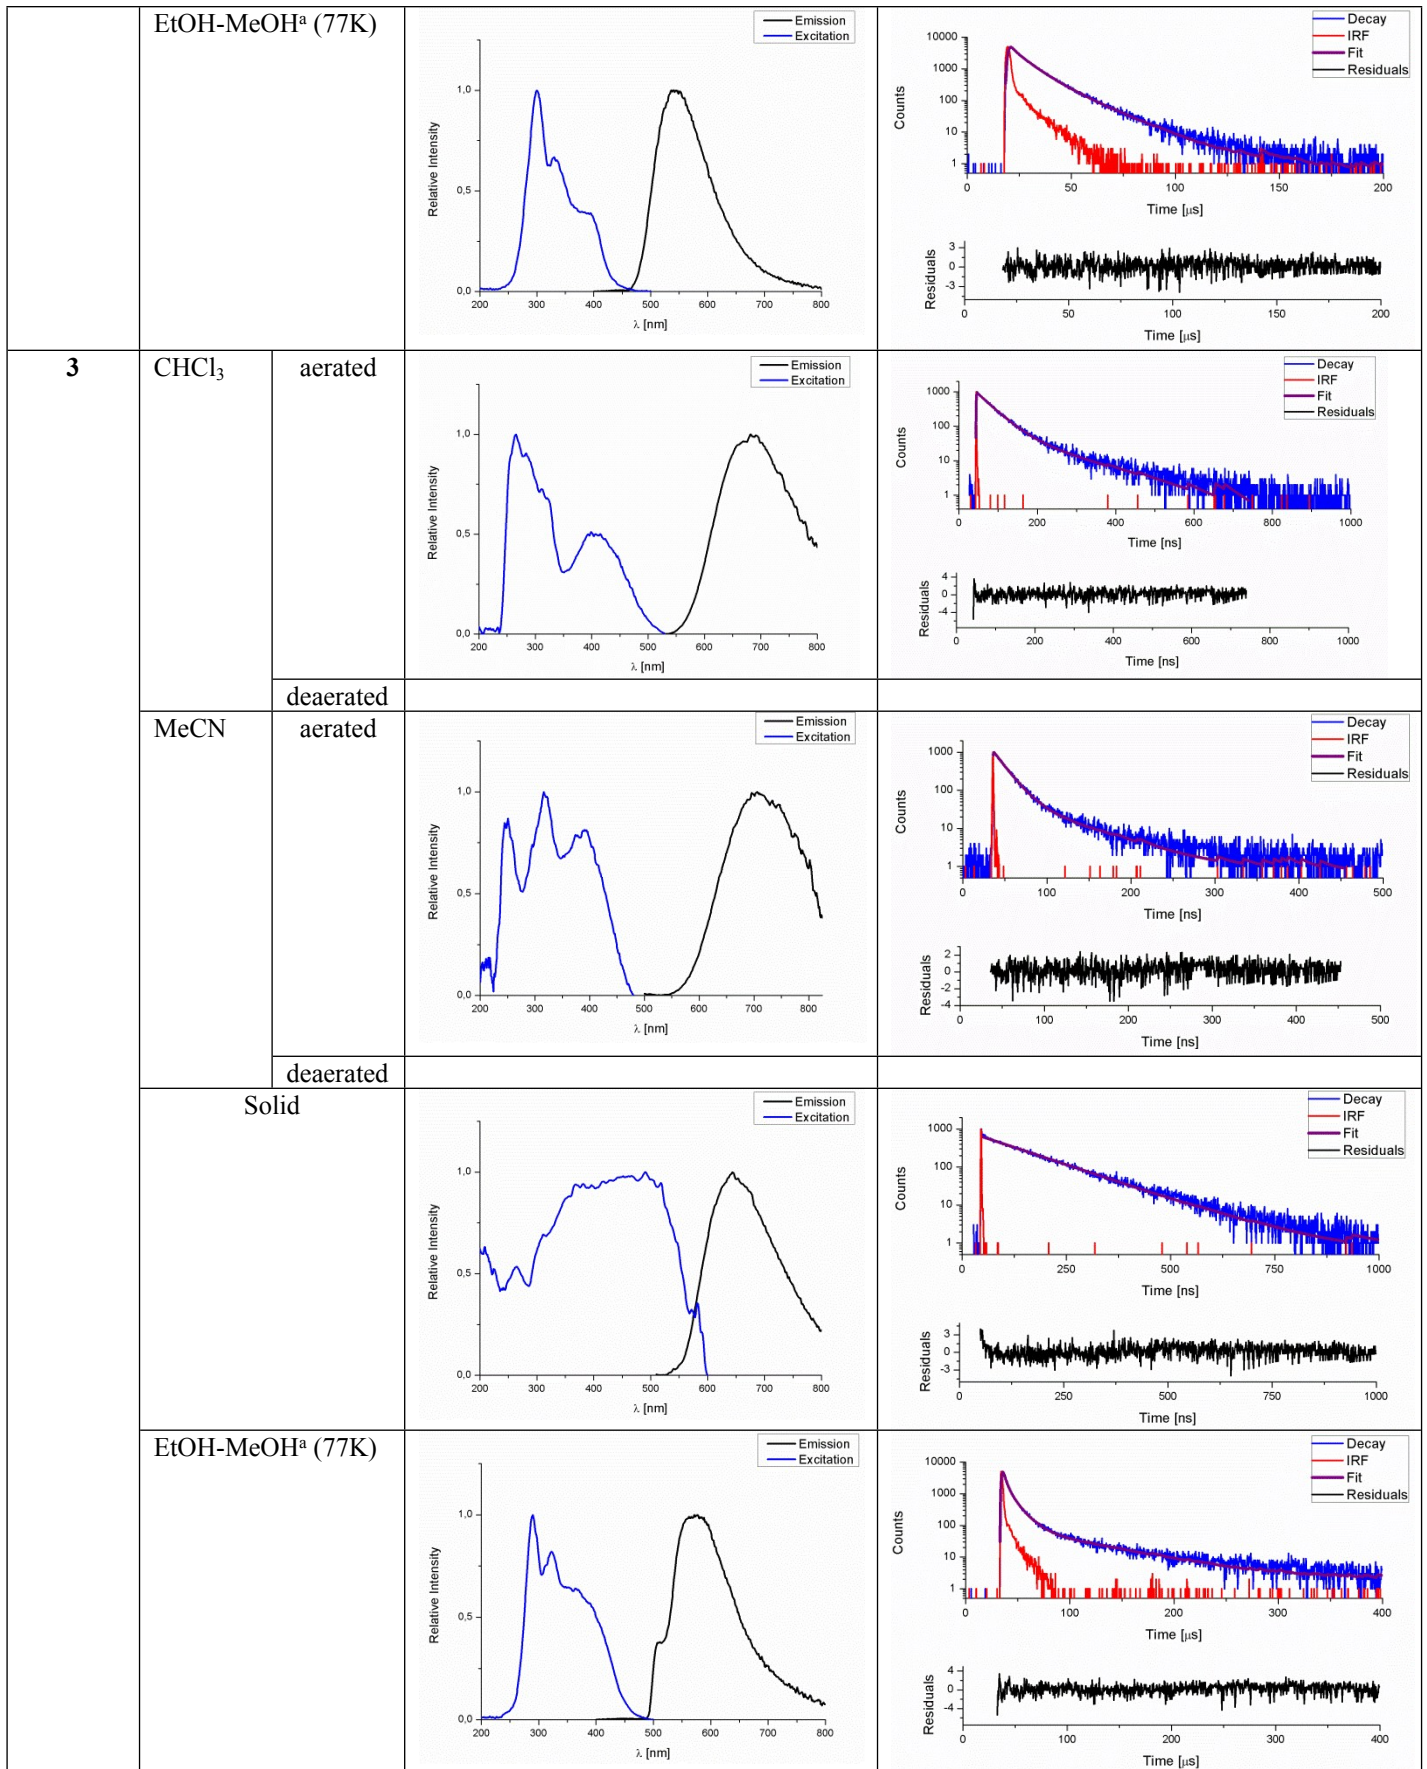



|   |                   |                              |  |  |
|---|-------------------|------------------------------|--|--|
| 4 | CHCl <sub>3</sub> | aerated                      |  |  |
|   |                   | deaerated                    |  |  |
|   | MeCN              | aerated                      |  |  |
|   |                   | deaerated                    |  |  |
|   | Solid             |                              |  |  |
|   |                   | EtOH-MeOH <sup>a</sup> (77K) |  |  |
| 5 | CHCl <sub>3</sub> | aerated                      |  |  |



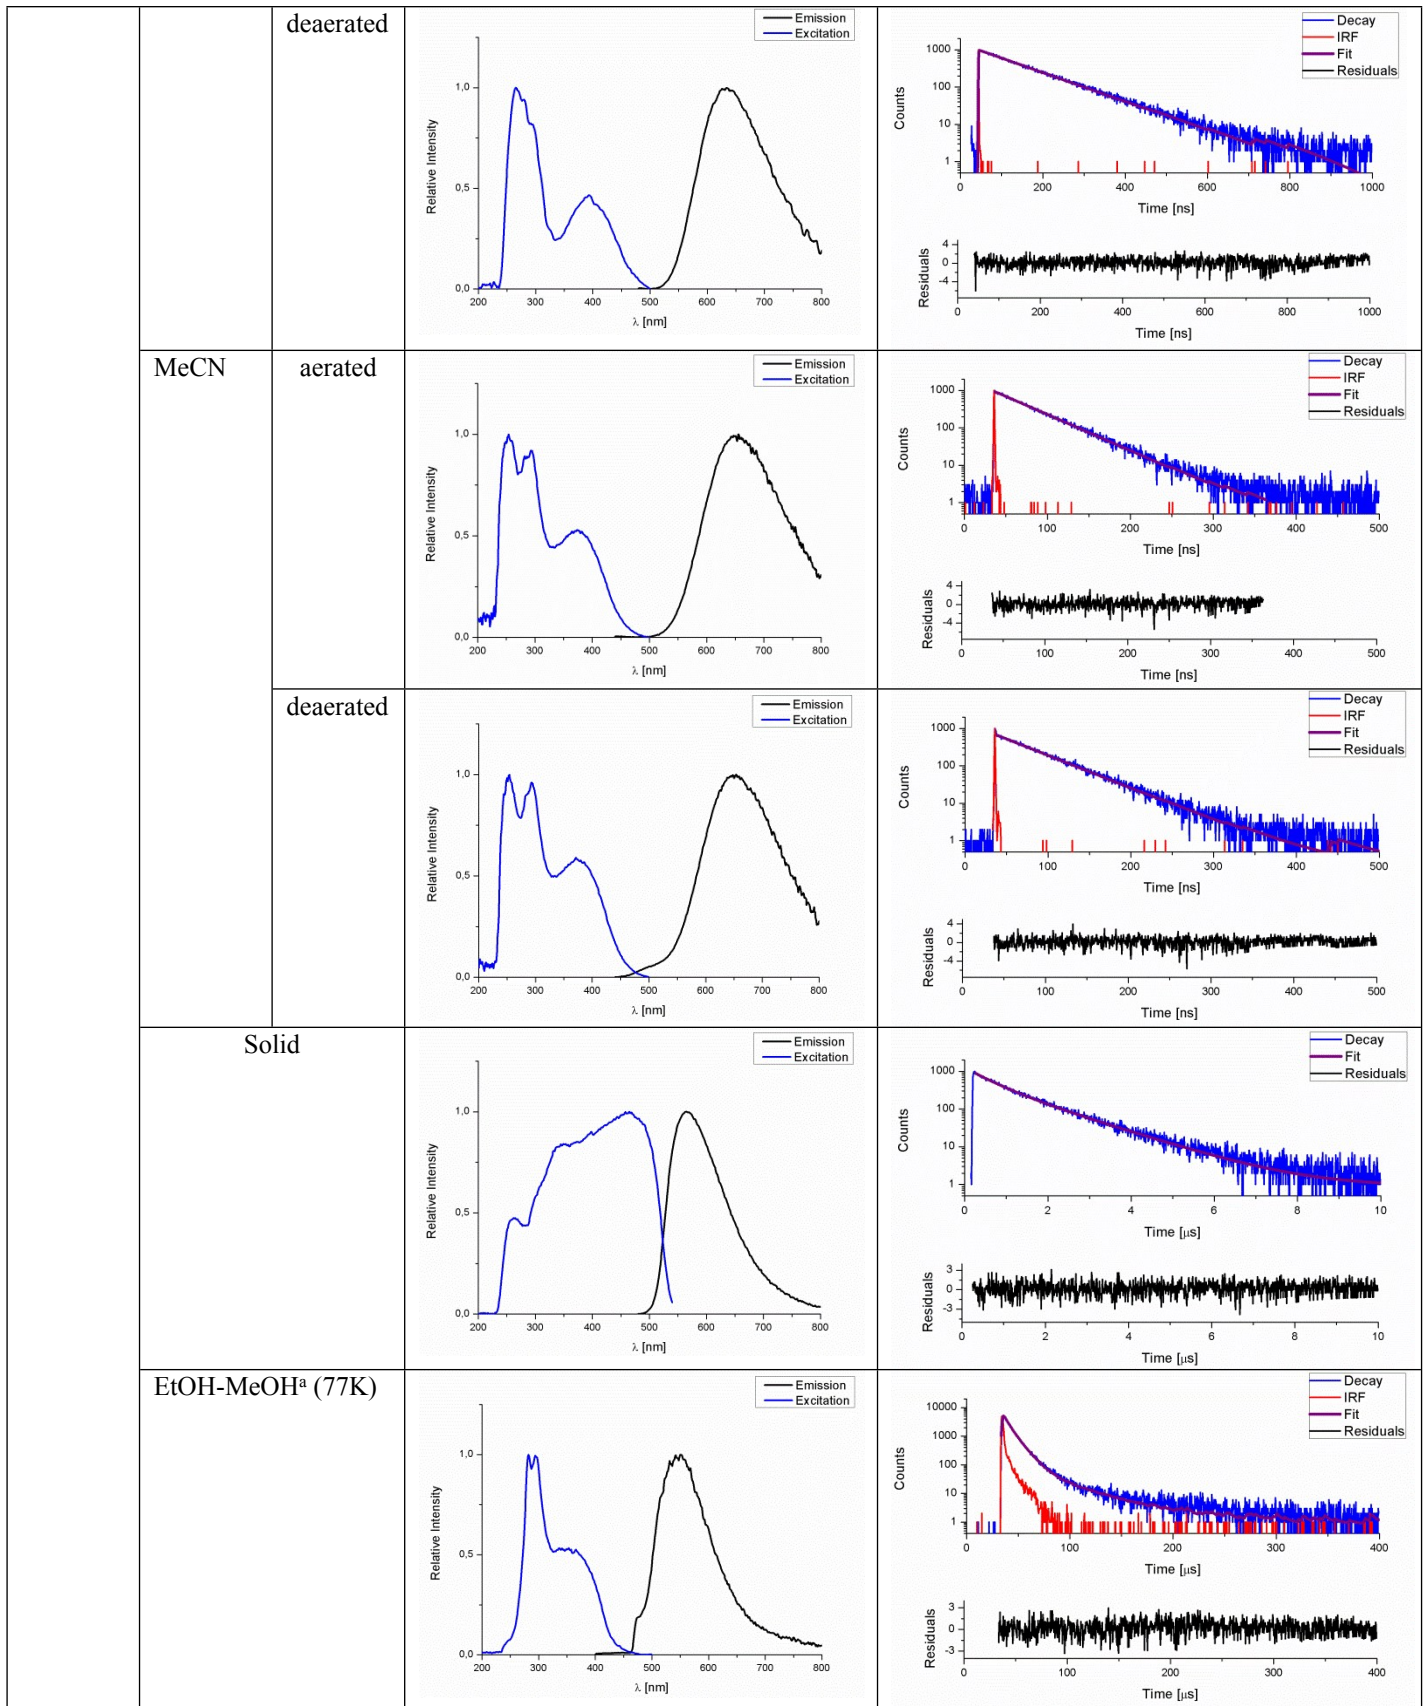

<sup>a</sup>(4:1 v/v);

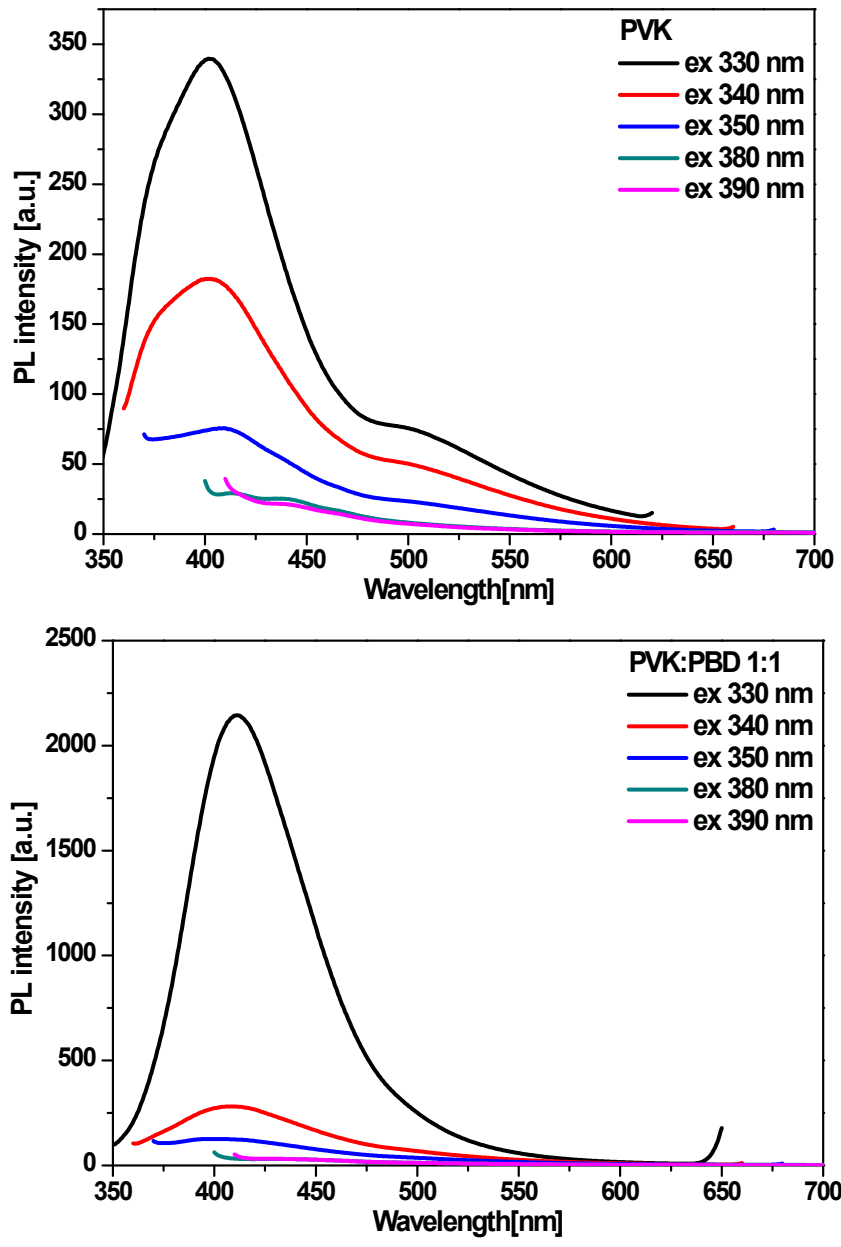

Figure S3. Emission spectra of PVK and PVK:PBD 1:1 films on glass.

| Compound | HOMO-3                                                                             | HOMO-2                                                                             | HOMO-1                                                                             | HOMO                                                                                | LUMO                                                                                 | LUMO+1                                                                               |
|----------|------------------------------------------------------------------------------------|------------------------------------------------------------------------------------|------------------------------------------------------------------------------------|-------------------------------------------------------------------------------------|--------------------------------------------------------------------------------------|--------------------------------------------------------------------------------------|
| 1        | 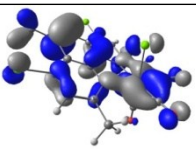  |   |   |   |   |   |
| 2        |   |   |   |   |   |   |
| 3        |   |   |   |   |   |   |
| 4        |   |   |   |   |   |   |
| 5        |  |  |  |  |  |  |

**Figure S4.** Frontier molecular orbitals of **1–5** computed at the DFT/B3LYP/DEF2-TZVPD level.

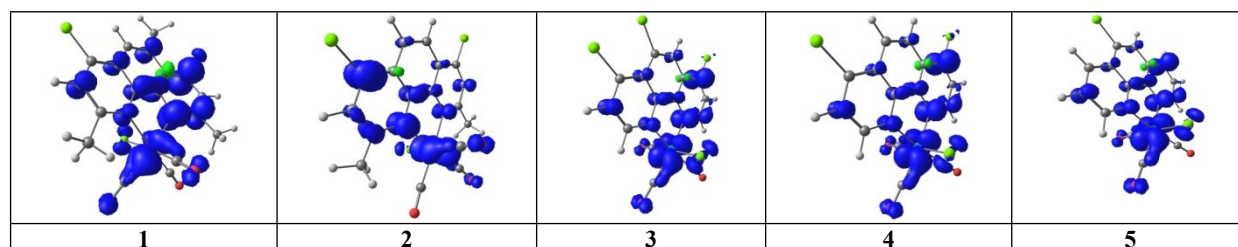

**Figure S5.** Isodensity surface electron spin density for compounds **1–5** at its  $T_1$  state geometry calculated at DFT/UB3LYP/def2-TZVPD level of theory associated with the PCM model in  $\text{CH}_3\text{CN}$  as a solvent. Blue and green colors show regions of positive and negative spin density values, respectively.

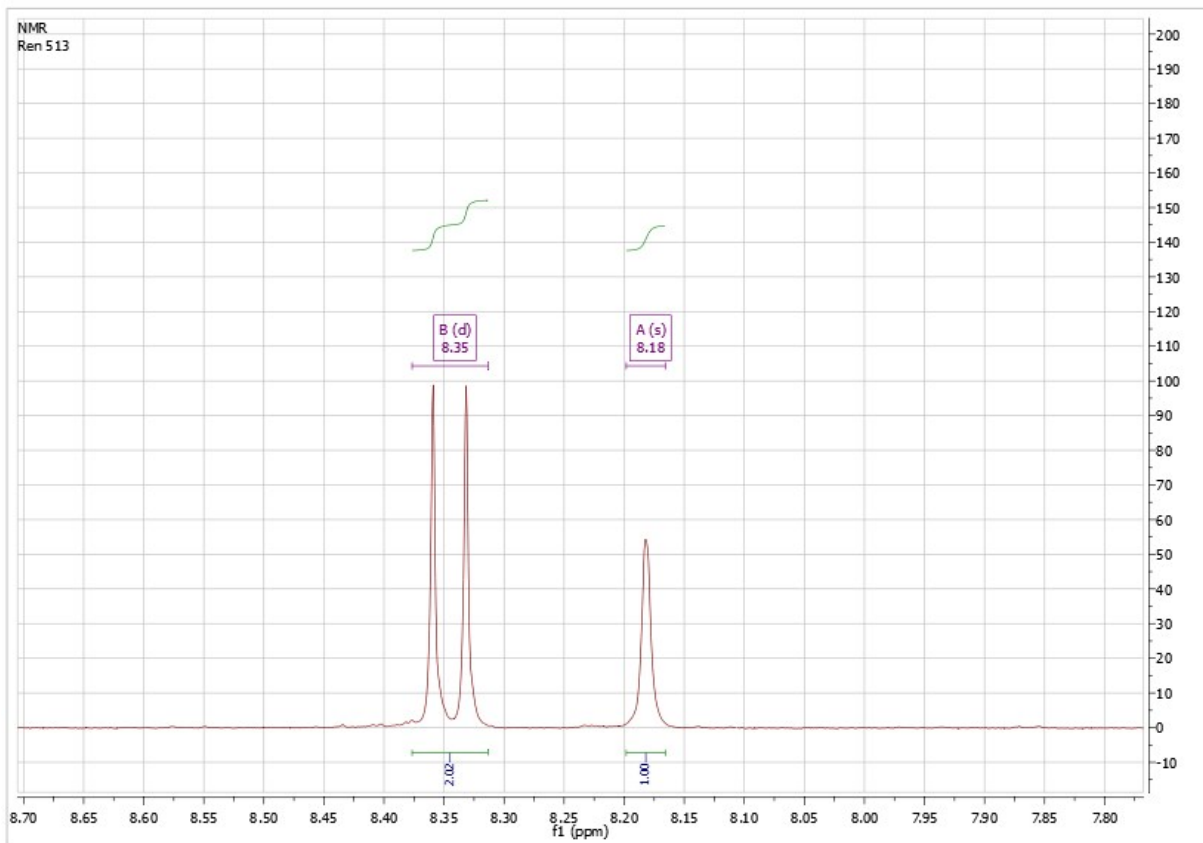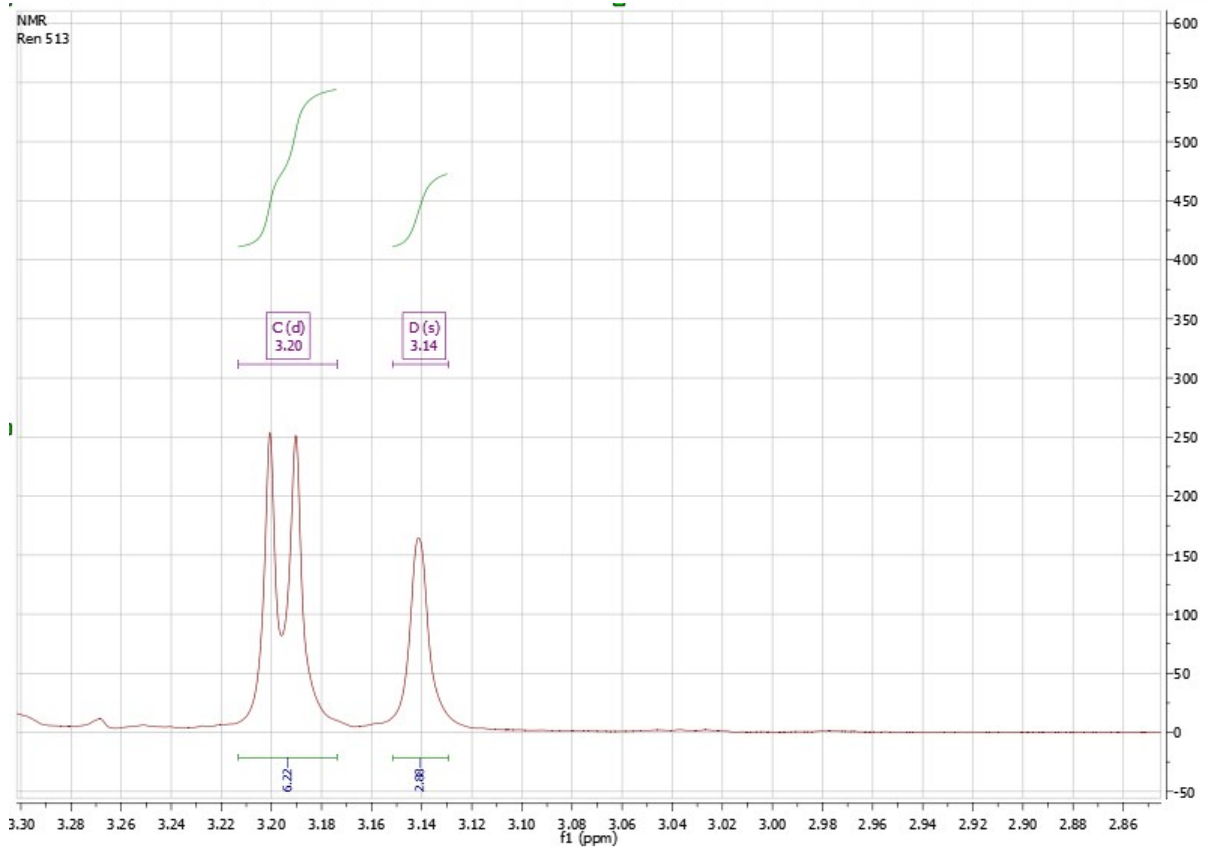

Figure S6. <sup>1</sup>H NMR spectrum of **1**

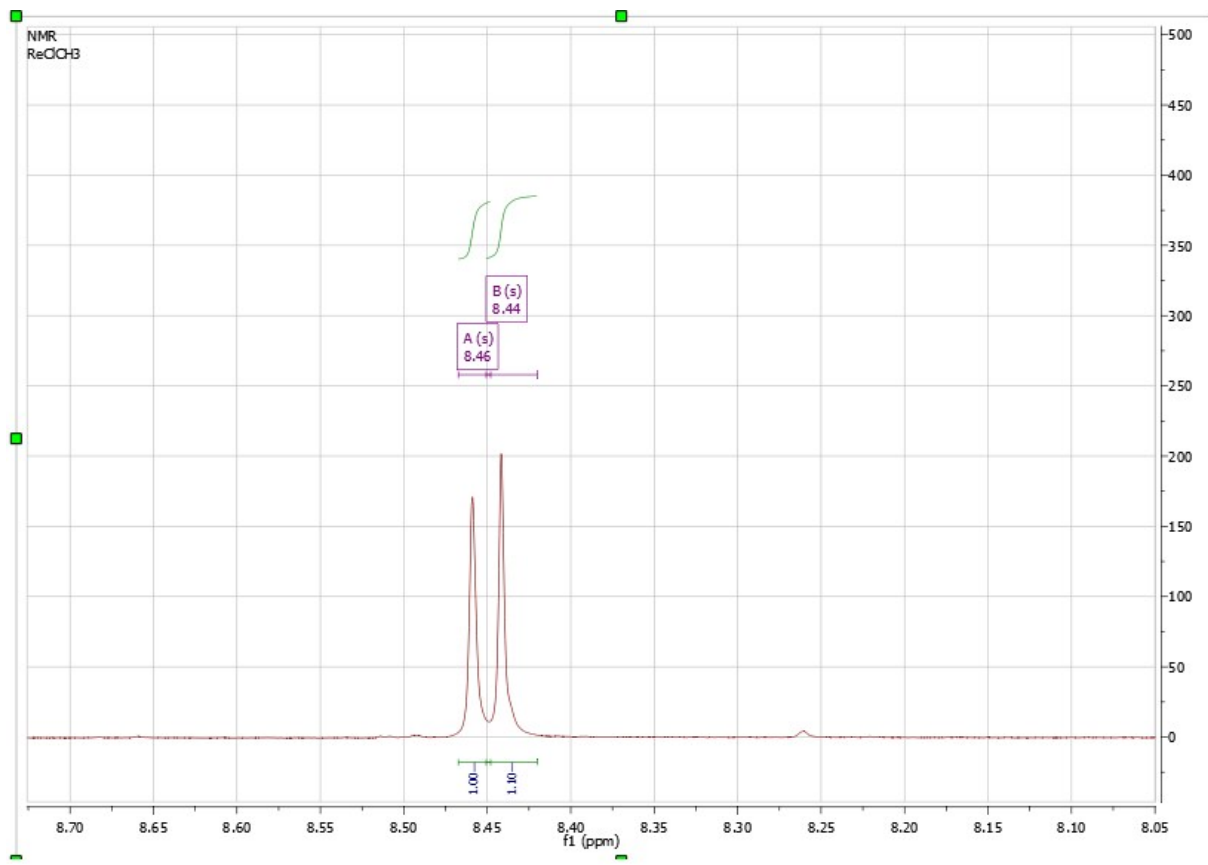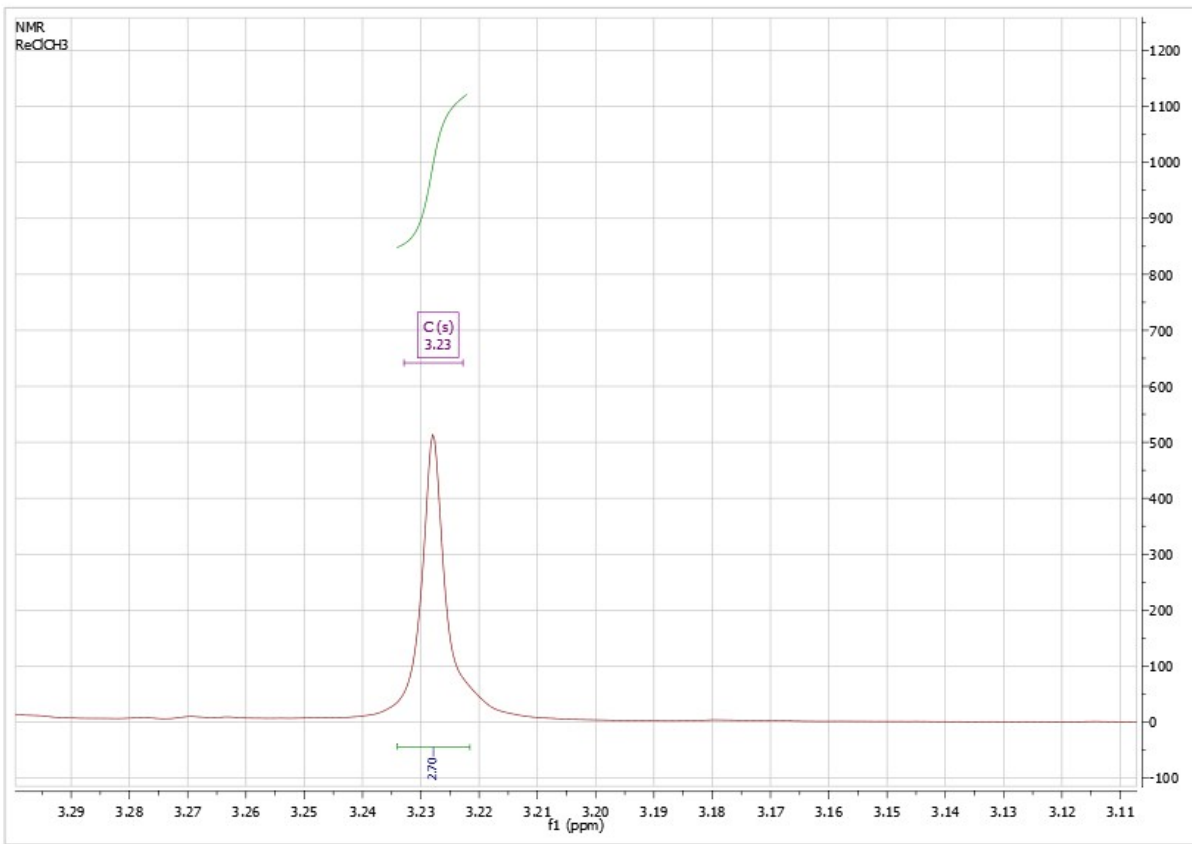

Figure S7. <sup>1</sup>H NMR spectrum of **2**



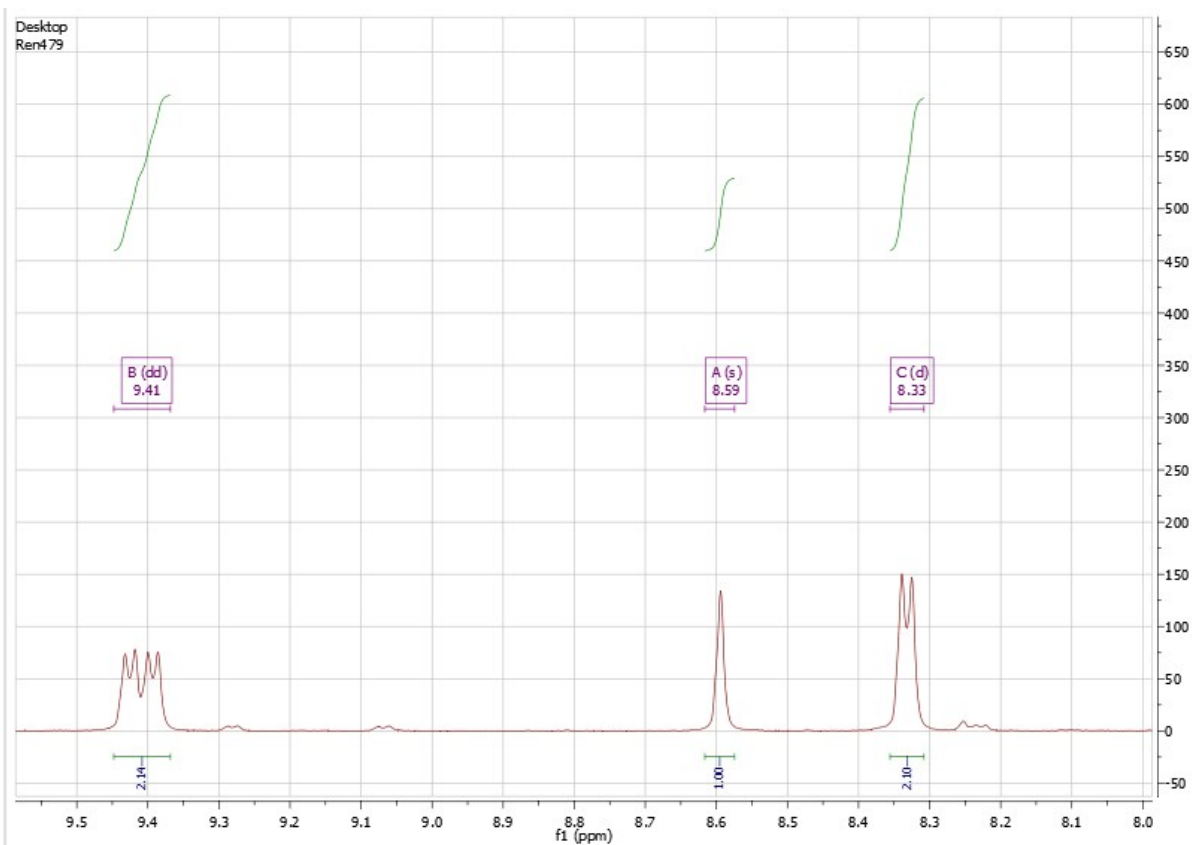

**Figure S8.**  $^1\text{H}$  NMR spectrum of **3**

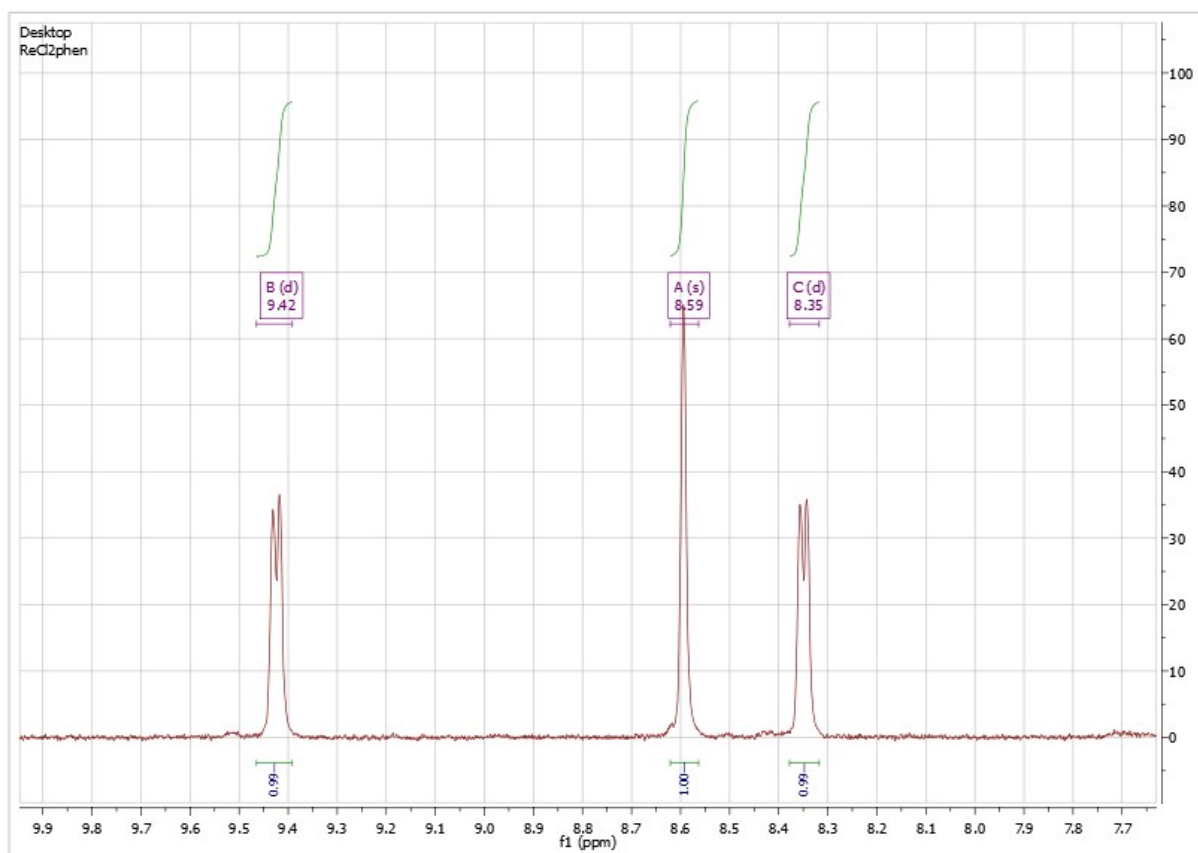

**Figure S9.**  $^1\text{H}$  NMR spectrum of **4**

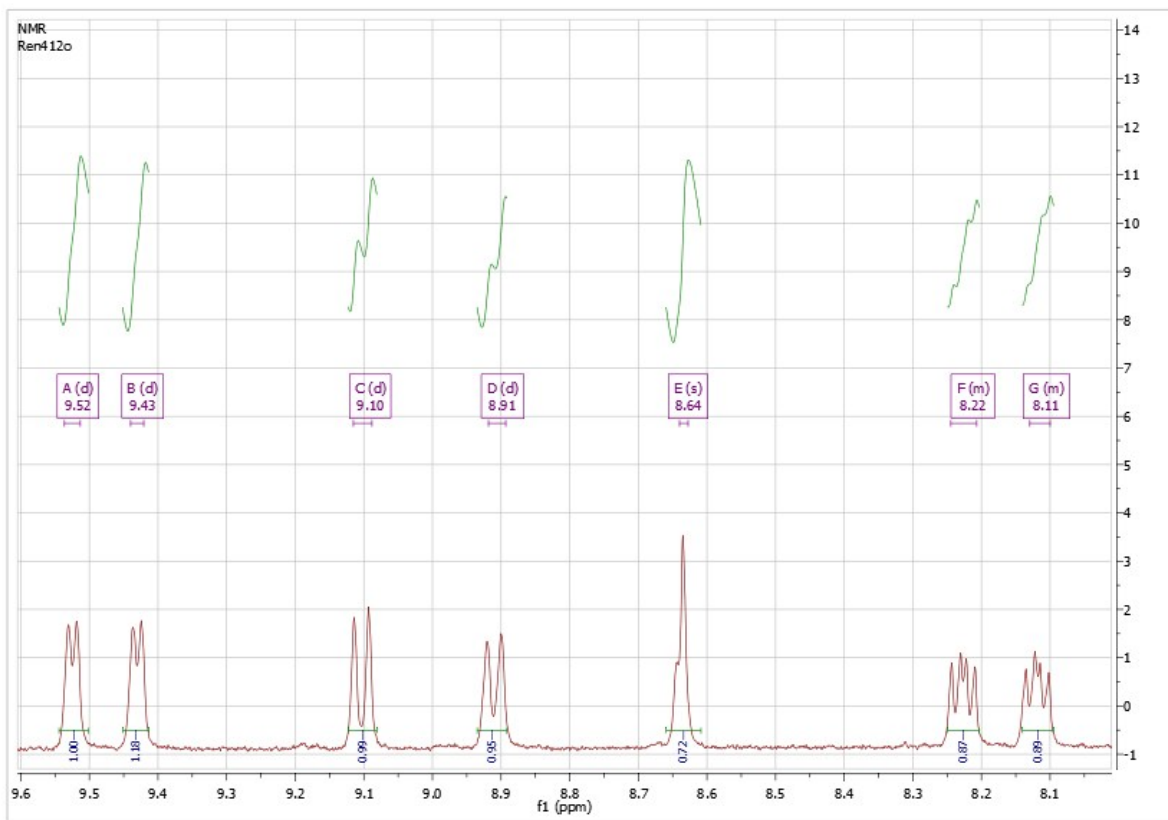

Figure S10.  $^1\text{H}$  NMR spectrum of **5**

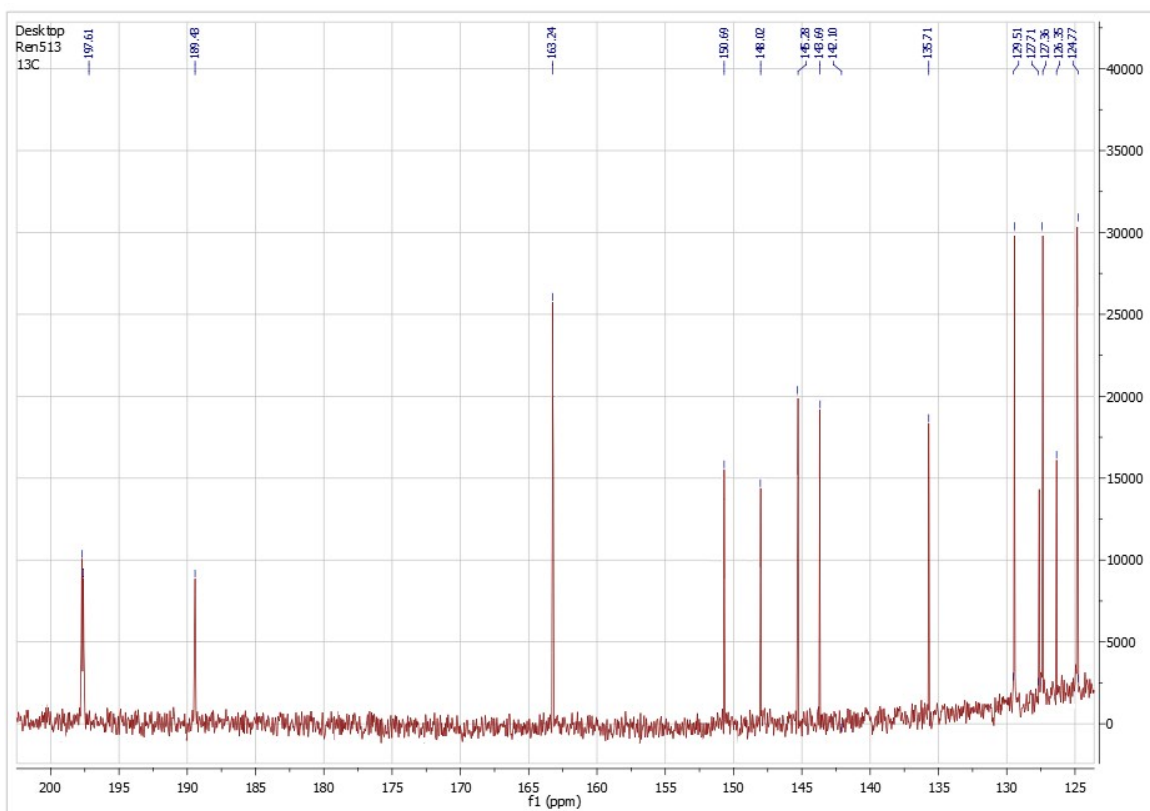

Figure S11.  $^{13}\text{C}$  NMR spectrum of **1**

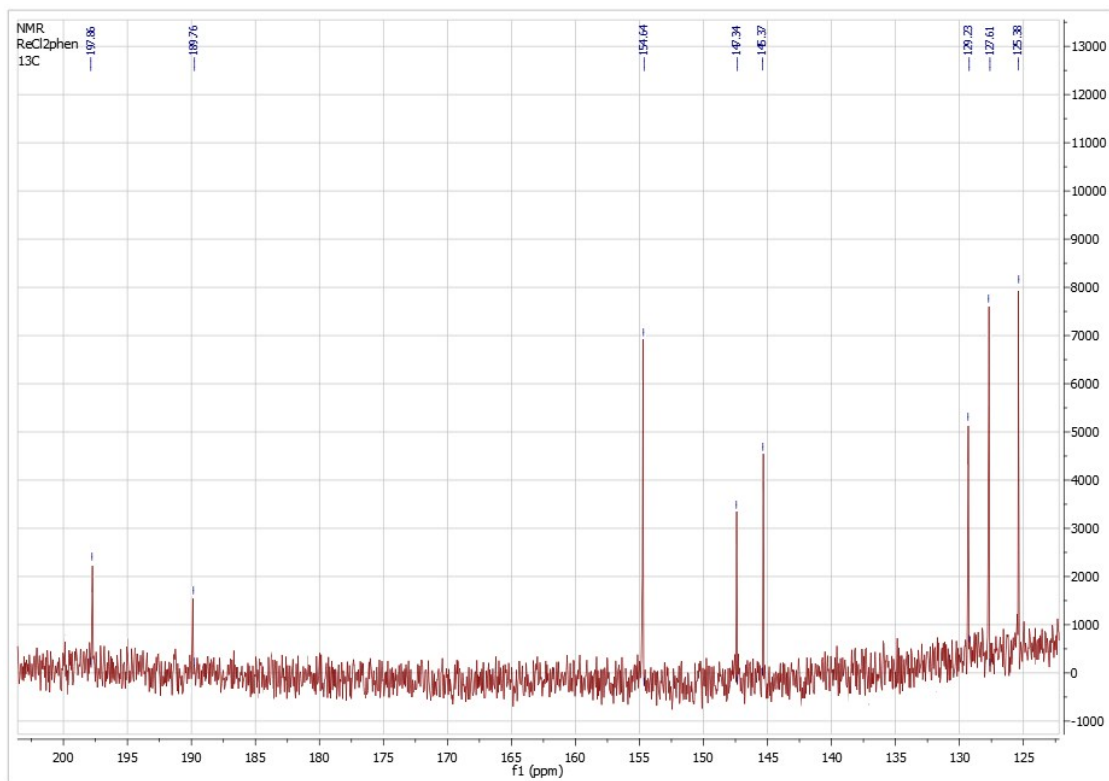

Figure S12.  $^{13}\text{C}$  NMR spectrum of **2**

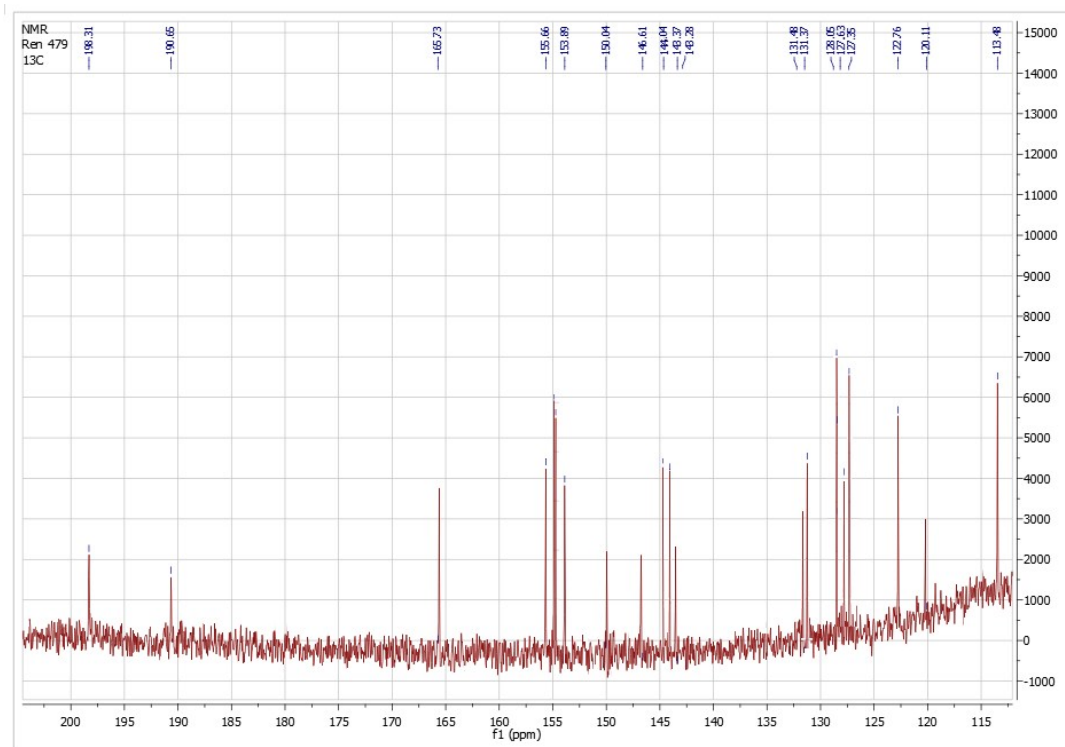

Figure S13.  $^{13}\text{C}$  NMR spectrum of **3**



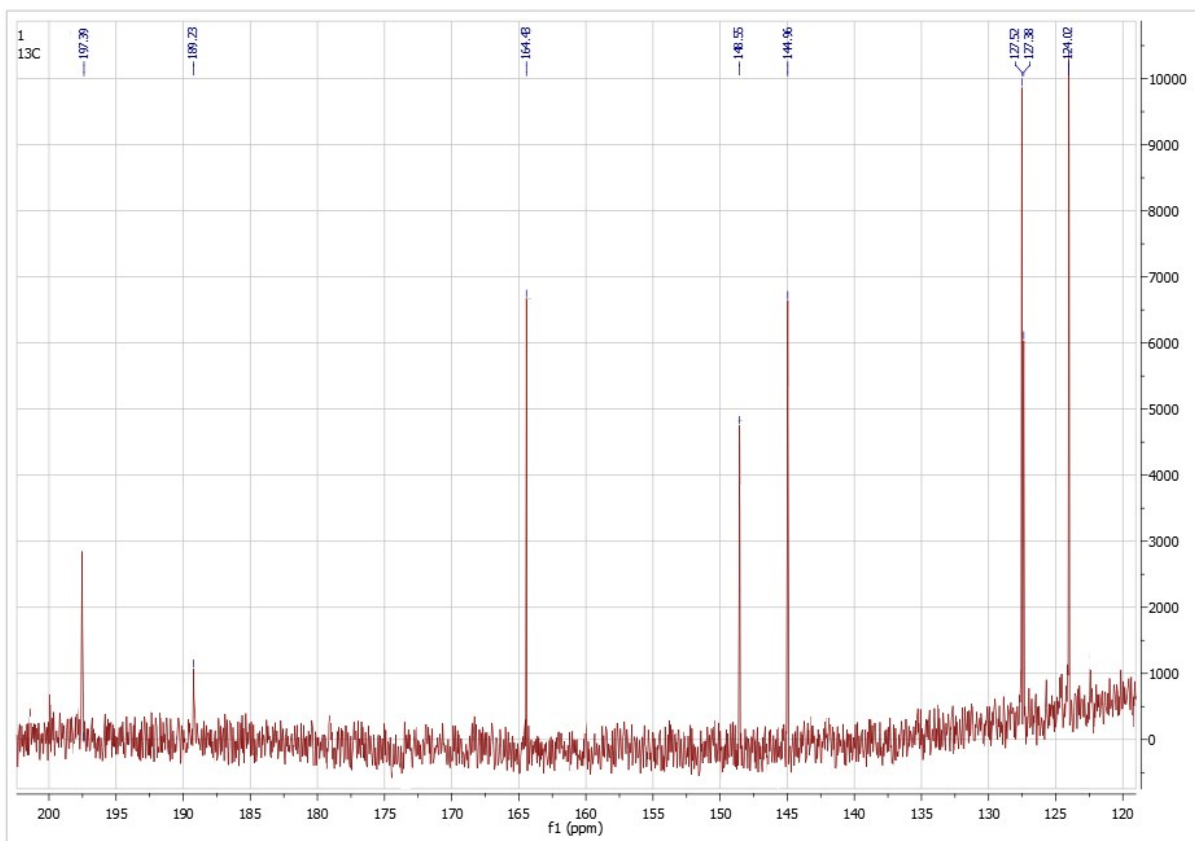

**Figure S14.**  $^{13}\text{C}$  NMR spectrum of **4**

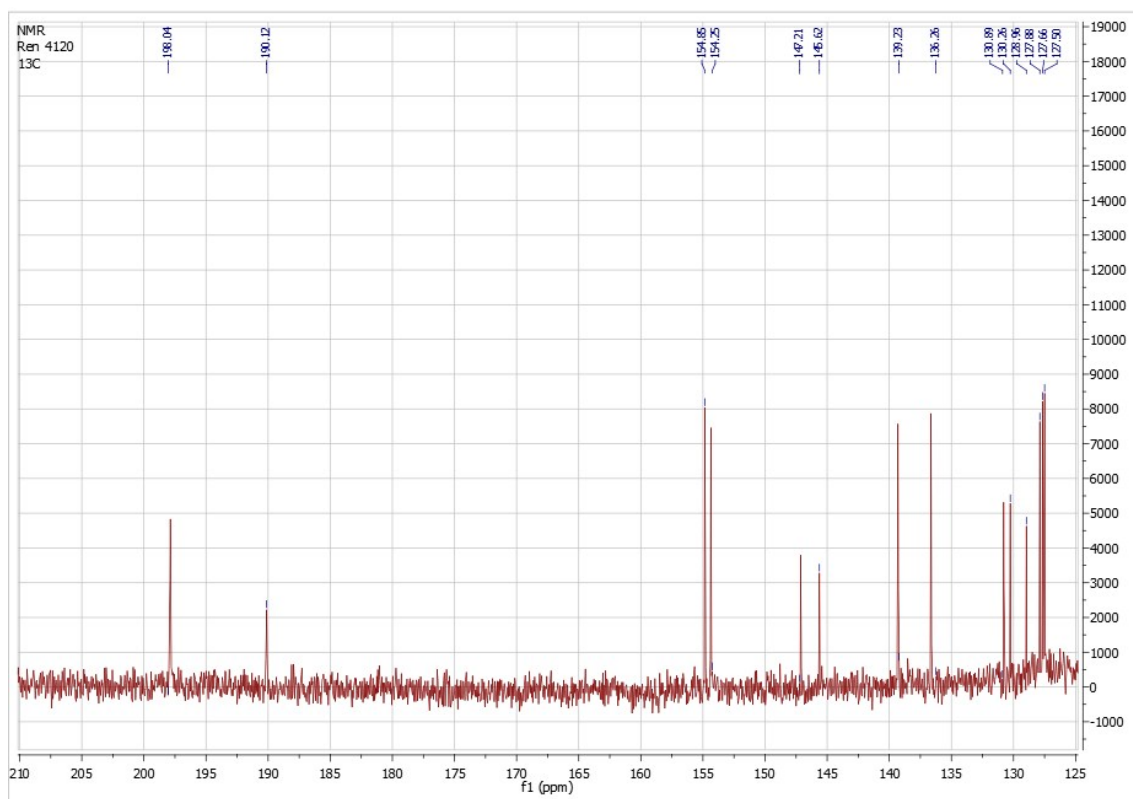

**Figure S15.**  $^{13}\text{C}$  NMR spectrum of **5**.

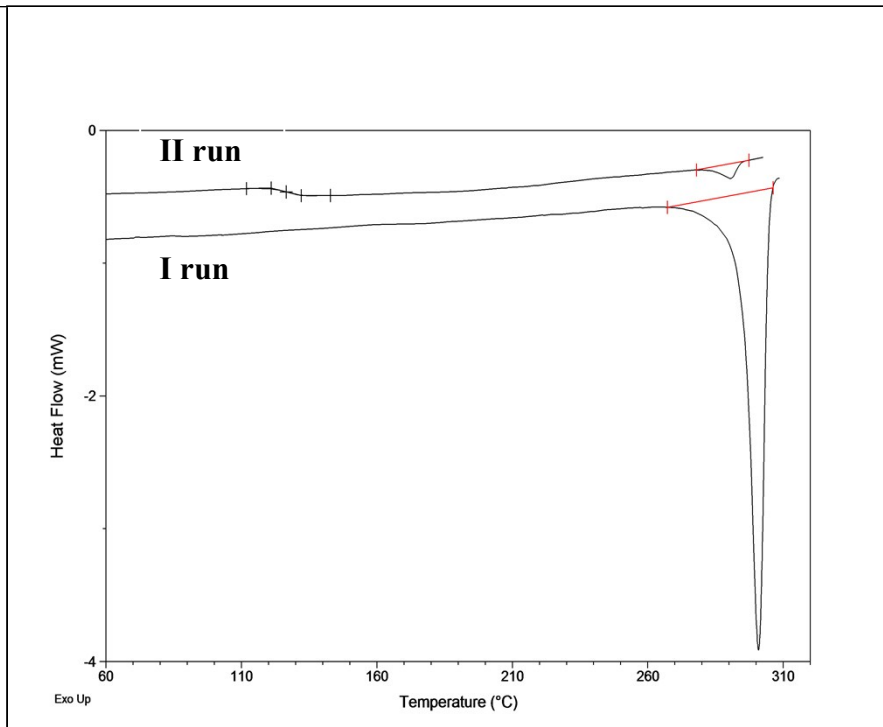

a

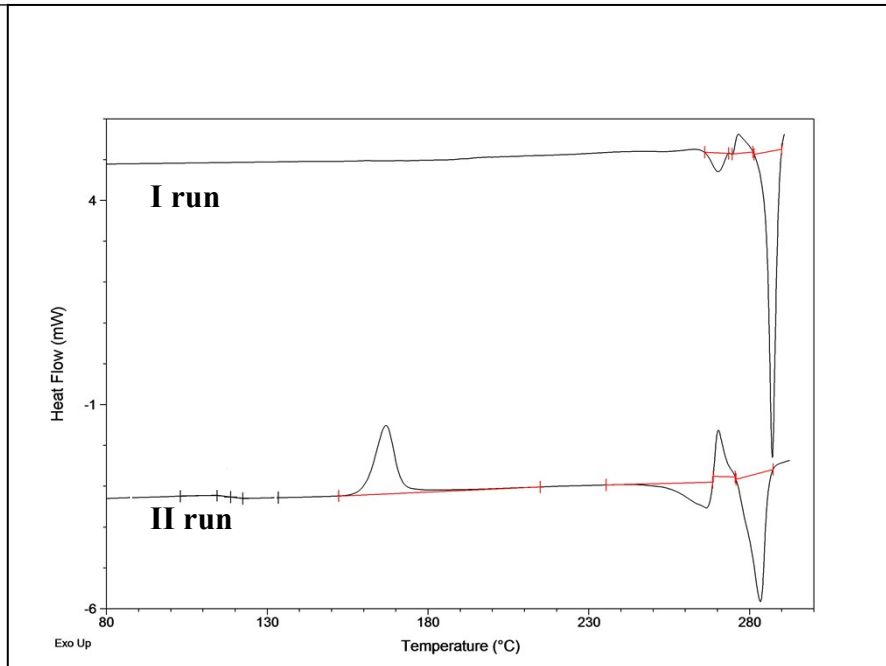

b

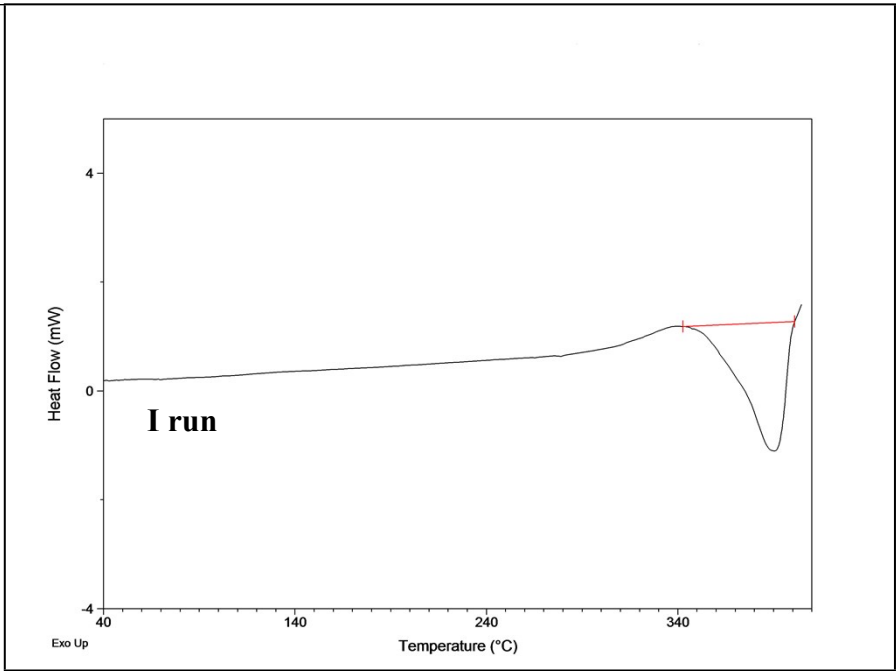

c

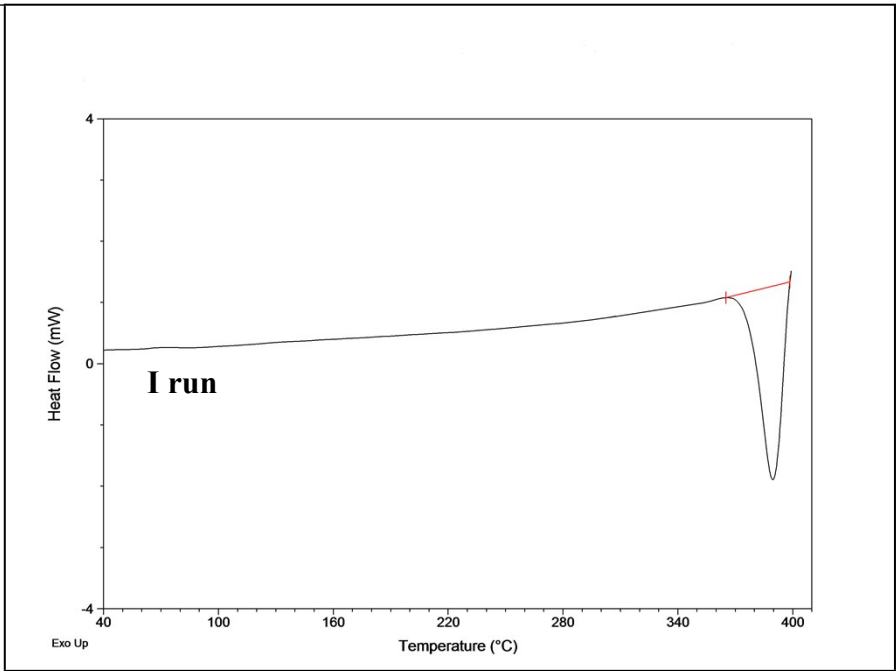

d

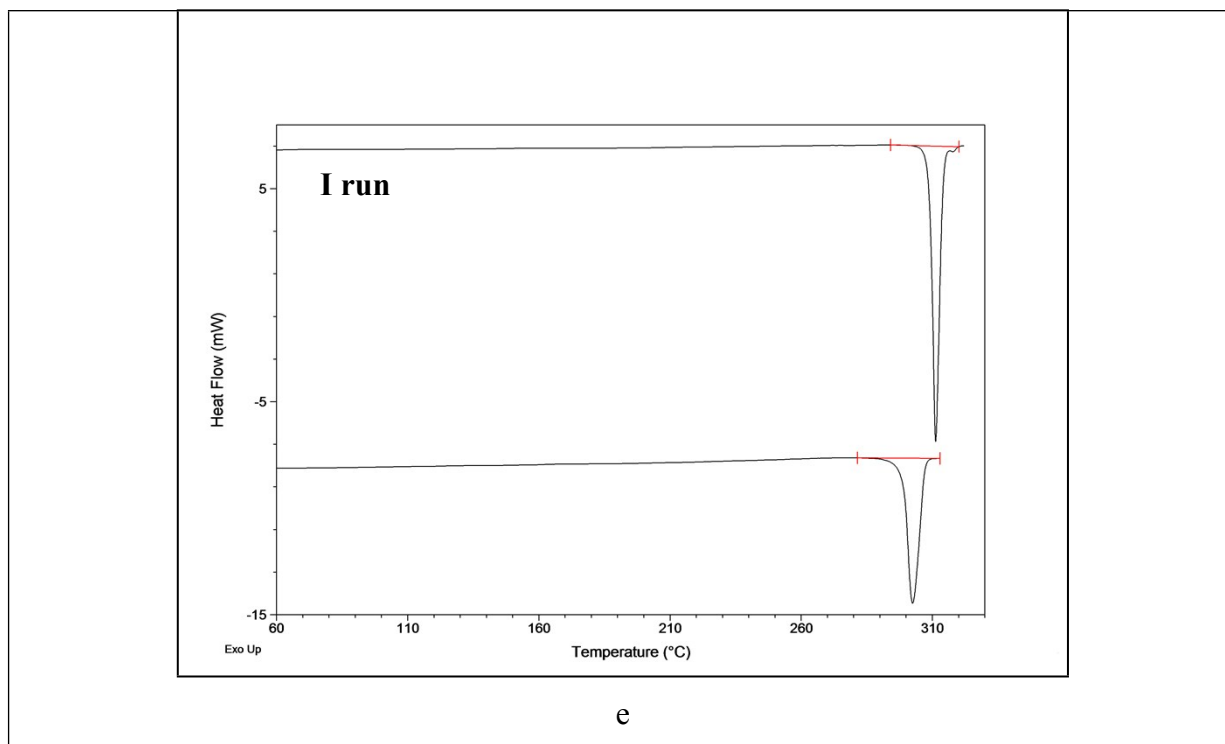

**Figure S16.** DSC thermograms (heating 20 deg/min) of all investigated complexes: (a) compound 1, (b) 2, (c) 3, (d) 4 and (e) 5.
